# Supplementary material for: Observation of Cirrus Clouds with GLORIA during the WISECampaign: Detection Methods and Cirrus Characterization
Source: Copernicus journal article supplement (doi:10.5194/amt-2020-394), 2020-10-26
Supplement: Supplementary file [file amt-2020-394-AC2-supplement.pdf]

## Final response to referee #2 comments on paper amt-2020-394

First of all, we would like to thank anonymous reviewer #2 for the constructive comments, which helped to improve the manuscript.

The comments are in bold letters and the answer in normal format. The page and line indicated in the answers correspond to the new version of the manuscript. At the end of the comments the revised manuscript is attached, with the additions in blue and the deletions in red.

### Anonymous referee #2

#### Specific comments

**1. L. 8, p.1: “cloud top bottom height”: Do the authors mean: “cloud bottom height”? Otherwise, what is the difference between “cloud top bottom height” and “vertical extent”?**  
The authors mean cloud bottom height. It has been corrected in the manuscript. (Page 1, line 9)

**2. L. 9, p.1: What do the authors mean by “fraction of cirrus clouds”? Is it an estimate of covered area referred to the global coverage? Is it restricted to some altitude range with respect to the tropopause level? Is there some time reference in terms of annual mean? The estimate of 13 to 27 % is different from what is mentioned in L. 18, p.1: is it a number derived from the GLORIA measurements?**

By ‘fraction of cirrus clouds’ we mean the percentage of the total number of observations made with GLORIA in which a cloud has been detected. Even the altitude range of the observations is from 6 – 15 km, the analysis is restricted to 8 – 15 km to minimize the influence of the water vapor continuum at lower altitudes. The estimated of 13 – 27% is referred to the duration and area of the WISE campaign and derived from the GLORIA measurements, depending on the detection method and the definition of the tropopause. Therefore, it is different to the one in L. 17, p.1, which refers to a global average during 1 year.

**3. L. 12, p.1: What do the authors mean by “unattached cirrus layers”?**

By ‘unattached cirrus layers’ we mean cirrus that are not associated with any other cloud.

**4. L. 17, p.1: Do the authors mean “one or banks of small white flakes”?**

‘one’ refers to the second genera of high clouds mentioned in L.17, p.1. Therefore, the intention of this sentence is to explain that the second genera (cirrocumulus) consist of banks of small, white flakes. However, following the suggestion of referee #3, the sentences ‘It is possible... cloud veils’ (Page 1, line 15-17 original manuscript) have been deleted.

**5. L. 20, p.1: “due to the low temperature of their environment”: I guess the scattering due to the presence of the cirrus is the main driver, and not the temperature: I guess an even cold, dry, cloud-free atmosphere is not equally absorbing than cirrus clouds in the same temperature conditions. Please clarify.**

This sentence has been modified to: “Cirrus clouds generally have a strong infrared greenhouse effect, leading to warming. However, optically thick cirrus with many ice crystals of a few micrometers, can have the opposite effect (Kraemer et. al 2016) ” (Page 1, line 19-20)

**6. L. 21, p.1: “they influence the amount of solar radiative energy received”: Is this statement not in contradiction with L. 19-20, p.1: “cirrus clouds are rather transparent to incoming solar radiation”?**

We do not consider it is a contradiction, as the influence of clouds in the radiative energy received can be due to absorbing it, or letting the light passing through them.

**7. L. 21-22, p.2: “2% of stratospheric cirrus : : 4-5% for MIPAS in middle latitudes”: To which quantity do these percentages refer ? To the global cloud occurrence frequency? On an annual basis?**

These percentages refer to a six year mean global distribution (2006 -2012). Information added in page 2, line 21-22.

**8. L. 35, p.2: What do the authors mean by “long light of sight”?**

As shown in figure 2, the line of sights extends several hundred km.

By ‘long line-of-sight’ we want to indicate that the path of the ray through the tangent layer is quite long (in the order of 226 km for a tangent altitude of 10 km).

**9. L. 2, p.3: What do the authors mean by “nature of the cirrus”? Do they mean the optically thin/thick or subvisible character, or the (microscopic) structure of the clouds, or something else?**

We mean any characteristic of the cirrus, both macrophysical properties (cloud top height, cloud top bottom, vertical extent) and microphysical (IWC, radius). Information added in page 3, line 7-8.

**10. L. 14-20, p.3: There are some repetition of information provided in p.2. The authors might consider remove them.**

Even there are some technical features of GLORIA that are repeated in the introduction and then in the section about the instrument, we prefer to leave it like it is now to emphasize why using GLORIA is interesting.

**11. L. 23, p.3: Except saving memory space, does such averaging present any advantage in better visualizing the vertical structure, by getting rid of the local variability? Table 1, p.4: This table seems to provide properties of both detectors (Fourier-transform spectrometer and 2D detector). It might be important to specify which one is concerned by each property. For instance, are both instruments covering the same range 780- 1400 cm<sup>-1</sup>?**

No, the horizontal averaging does not improve visualizing the vertical structure. It improves the signal to noise ratio. The GLORIA instrument is formed by a Michelson interferometer and a 2D detector array that registers the beam coming out of the interferometer. The 2D detector produces interferograms that are transformed to the space domain to produce calibrated spectra using the Fourier transform. Table 1 provides information about the GLORIA instrument as a whole.

**12. Figure 1: The choice of map does not render very well the location of land, and specifically of countries of importance, like Ireland and UK. Has the colour code (e.g. with all range of blue colours at the level of the sea and oceans) any importance for the present study? If yes, the meaning of the colour code and a colour map should be provided. If not, I suggest to change the choice of map to make the information of importance (I guess: the geolocation) clearer and more visible.**

The colors of the map are of no importance for this study, therefore, the map has been changed to a white background, with the country lines in black and the land in grey.

**13. L. 4-5, p.5: It seems useful to give some more insight into what static stability is, by giving some value of the static stability for extreme cases and/or by giving some equations that would also be useful to explicit the temperature dependence mentioned in l. 6, p.5. The quantity N should be defined. This paragraph indicates that the static stability is an important parameter, but it is not clear why, and for which purpose the stability of the atmosphere has to be computed.**

The following explanation has been added (page 6, line 8-15):

‘The static stability ( $N^2$ ) used to analyzed the stability of the atmosphere was computed from GLORIA retrievals. The static stability is the square of the Brunt-Vaisala frequency ( $N$ ), defined as:

$$N = \sqrt{\frac{g}{\theta} \frac{\partial \theta}{\partial z}}, \quad (1)$$

where  $g$  is the local acceleration of gravity,  $\theta$  is the potential temperature, and  $z$  is the altitude of the air parcel.  $N^2$  describes the vertical temperature stratification of the atmosphere and gives an insight of if an air parcel is in a transition region between the troposphere, characterized by low  $N^2$  ( $N^2 \approx 1 \times 10^{-4} \text{ s}^{-2}$ ) and the stratosphere, characterized by high  $N^2$  ( $N^2 \approx 5 \times 10^{-4} \text{ s}^{-2}$ ) (Grise et. al 2010).’

**14. L. 10, p.5: If possible, I suggest to add some reference in English providing a description of JURASSIC2 for the more general readership of the journal.**

The following references have been added (page 6, line 21-22):

(Hoffman et al., 2008; Griessbach et al., 2013; Ungermann et al., 2015)

**15. L.10, p.5 - l.5, p.6: In view of the very scarce documentation provide about JURASSIC, I suggest to extend a little bit the description, and make it somewhat less cryptic.**

**E.g., concerning the retrieval technique, what is the retrieved quantity, and from which quantity-ies? If the inversion technique has some similarities with the one used for limb sounding measurements or any other techniques, this might be mentioned. A reference is needed about the Schwarzschild equation.**

The retrieved quantity in this study is the extinction coefficient (page 6, line 30). From Sec. 2.4 (where JURASSIC2 is introduced) the reader is referred to Sec. 3.2 for an explanation about the extinction retrieval. To retrieve the extinction, an inverse problem must be solved, where the measurements are the radiances in the spectral region  $832.4 - 834.4 \text{ cm}^{-1}$ . A reference to Ungermann et al. (2015) with a detailed description of the retrieval is added. (Page 9, line 2).

JURASSIC2 is adequate for the retrieval of trace gases, temperature and the extinction coefficient from measurements of both remote sensing limb and nadir sounders in the infrared (Griessbach et. al, 2013). This feature is now specified in page 6, line 22: 'It combines a forward model with retrieval techniques (for both limb and nadir geometries) and allows us...'

A reference about the Schwarzschild equation is added in page 6, line 24: (Petty, 2006; Wallace and Hobbs, 2006).

**16. L. 11-12, p.6: What do the authors mean? Cloud index and extinction coefficient are physical quantities, and not methods.**

We mean two different ways of identifying clouds in our measurements. The first way is using the CI and the second way the extinction coefficient.

The sentence has been changed so it is clearer: 'To analyze the data, two methods to identify optically and vertically thin clouds at high altitudes were used. One method used the cloud index and the other the extinction coefficient.' (Page 7, line 1-2).

**17. L. 16-17, p.7: "The difference (: : :) is 21%": please specify the metric used.**

The metric used is the mean of the median of both flights. Added in page 8, line 18: 'The difference (calculated as the mean of the median difference of both flights) between the extinction neglecting...'

**18. L. 12-19, p.7: From this paragraph, it appears that the present case is a rather unfavourable case with respect to the study by Höpfner and Emde (2005). From runs on test cases that are not described, a quite large difference is found between the retrieved extinction coefficient using no-scattering approximation, and the retrieved extinction coefficient using single scattering (which is a simplified case with respect to the actual multiple scattering case). In the no-scattering case, quite high values are found for the most extreme cases (P5 and P95). From all these data, it is difficult to convince (at least the non-expert) that a non-scattering approach is sufficient. The authors might provide the values of the difference at 2 x the standard deviation (P16 and P84) or interquartile values or another useful metric. They also should specify how the test cases were chosen (using different typical cirrus cloud configurations? Was the distribution of the different kinds of situations representative for real atmospheric conditions at the considered latitude?). Finally, an important and more convincing argument would be to provide an estimate of the uncertainty on all target macrophysical quantities and on the detected cirrus cloud fraction, possibly in function of the latitude.**

We have added the values of the difference at P16 and P84 in page 8, line 20-21. The mean difference at  $2\sigma$ , i.e. percentile 16 and percentile 84 is -4% and 49%, respectively.

The two flight selected for the single scattering run were chosen because both thin cirrus and thick cirrus were observed, and therefore, constitute an interesting case for studying the influence of scattering in different cases. Added in page 8, line 17-18.



For the flights with single scattering, the CTH was computed following the same procedure as for the flights with no scattering. The agreement in the detection of a CTH was 98% for both study cases. The altitude of the CTH is for ~ 71% of the profiles the same, being the typical difference 0-0.375 m. Following the same procedure for the CBH, the agreement in the determination of a CBH for the detected CTH is 90%, obtaining the same altitude in 58% of the coincidental profiles. The typical difference for the CBH is also 0 – 0.375 m. The detected clouds for both flights and both runs cover the range 45°N - 75°N, with the largest occurrence between 55°N – 75°N. This information has been added in page 8, line 21-27.

**19. L. 27, p.7: What do the authors mean by “elevation angle offset”? A reference to a paper about the instrument might be useful.**

The instrument has different elevation angles that correspond to different tangent altitudes of the lines of sight. The elevation angle offset is the error in the determination of this angle.

A detailed explanation of the instrument and its concept is given in Friedl-Vallon et al. (2014) and Riese et al. (2014) (Page 3, line 18)

The reference for the characterization of the errors related to the instrument and the retrieval is Ungermann et. al 2021 in preparation (Page 9, line 12)

**20. L. 1-2, p.8: Should this error of 125 m be added to GLORIA’s 140 m-vertical resolution? How does it affect GLORIA’s ability to detected small-scale structures mentioned in §2.1?**

Both quantities should not be added. 125 m corresponds to the error in the model grid, whereas 140 m corresponds to the vertical sampling at a certain tangent altitude and observer altitude.

The model includes corrections of the field of view and the sampling. In Sect. 2.1 we mention structures of about 500m, which can be detected by GLORIA.

**21. Caption Figure 3: “First filtering of optically thicker regions”: Do the authors refer to the aerosol contributions? It would be useful to specify.**

Aerosol contribution are usually much weaker than cloud emissions. When the clouds are optically thick, GLORIA is not able to measure anything beyond them and the radiance profiles become saturated. By “first filtering of optically thicker regions” we refer to the layers where the clouds are too thick and can affect the tangent layers above. These information has been added in the caption of Figure 3 (page 10).

**22. L. 12-13, p.8: “Above the clouds”: please specify the vertical range affected by this regularization effect. Which method is supposed to be affected by this problem?**

The vertical range affected by this effect is between 1-2 grid points (0.125 – 0.250 km). This is a general effect of the extinction retrieval. Added in page 9, line 20.

**23. L. 18-19, p.8: A reference is needed for this choice of criteria for clear sky conditions. “CI always greater than 2”: What do the authors mean by “always”?**

This criteria was selected specific for this study. After the selection of clear sky profiles, cross-sections for all flights (similar to Figure 3), were plotted just with the selected profiles to ensure that no clouds where being included.

By always we mean that the single profiles have a CI greater than 2 for all altitudes.

**24. L. 18-20, p.8: In which extend is this pre-selection coarse? Does it miss cloudy conditions, does it identify too much clear-sky conditions as cloudy ones, or randomly fails to distinguish clear-sky and cloudy conditions?**

To check the performance of both algorithms, we plotted cross-sections of cloud index and extinction for all flights only with the clear sky profiles to compare both selection criteria (similar to Figure 3). The pre-selection identifies less clear sky conditions than the vertical gradient of extinction criteria and at the same time identifies as clear sky profiles that contain clouds. These falsely identified profiles are not included in the second selection, confirming that the second selection yields more reliable results.

**25. Caption Figure 4: “Clear sky profiles of the vertical gradient (: : :)” looks strange. Wouldn’t it be better to write “vertical gradient of the extinction coefficient in the case of clear sky conditions” ?**

Changed to the suggested sentence. (Page 11)

**26. Figure 4: I guess the reason why the width of the scattering cloud is quite constant down to ~8 km, and then rapidly increases with decreasing altitudes (linked afterward with the water vapour influence), is related to the presence of the tropopause level. The authors could usefully add some line representative for the tropopause level for the sake of clarity.**

Figure 4 has been changed to the following figure. It shows the median (10.1km) and mean tropopause (10.7 km) of all clear sky profiles.

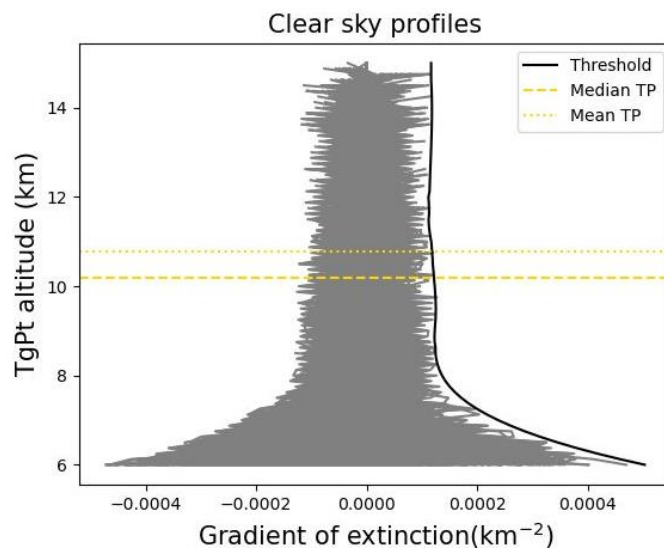

**27. L. 23-24, p.8: Do the authors expect to miss many cirrus events by using this apparently very conservative criteria (following Fig. 4)?**

Figure 4 contains the threshold used for the selection of clear sky conditions (please, read answer to comment 24).

Giving an exact value about the false positive or false negative would require a study with synthetic data where we know where the clouds are. In general, we do not expect neither miss nor identify too many. The described threshold (Figure 5) has been created to identify clouds,

especially optically thin ones and to prevent the false identification of clouds as aerosols. So far, avoiding this confusion has been achieved. Using the methods from Griessbach et al. (2014; 2016) to discriminate between ice and volcanic ash and ice and aerosols such as sulfuric acid, has yield positive results, as almost all grid points identified as clouds where correctly identified.

**28. L. 28, p.8: PDF should be defined.**

Added in page 10, line 2.

**29. L. 30, p.8: Where is the value  $2 \times 10^{-4} \text{ km}^{-1}$  coming from? Figure 4 provides a value of  $1.1 \times 10^{-4} \text{ km}^{-1}$ .**

This value is coming from Fig.5, right plot, where the threshold for extinction is plotted as the black line. This plot is tangent altitude vs extinction, whereas Fig.4 is tangent altitude vs gradient of extinction. Therefore, Fig.4 cannot be used to infer the value of  $2 \times 10^{-4} \text{ km}^{-1}$ . To avoid further misunderstandings, more information has been added:

‘This threshold is sensitive to structures with very low extinction, down to  $2 \times 10^{-4} \text{ km}^{-1}$  for a tangent point between 11.5km and 15km (Fig.5).’ (Page 10, line 4-5).

**30. L. 31-32, p.8: It would be useful that the authors provide here the estimates by Sembhi et al. (2012) and by Griessbach et al. (2020).**

As Griessbach et al. (2020) provides an overview for several instruments, a reference to Table 1 of the cited study is added.

‘This detection limit is similar to the one provided by Sembhi et al. (2012) for MIPAS, with an extinction detection limit above 13 km of  $10^{-4} \text{ km}^{-1}$  and to the findings of Griessbach et al. (2020) specified in Table 1 of the cited study.’ (Page 10, line5-7).

**31. L. 32-34, p.8: Where are the estimates of the CI threshold and considerations about “low number of count shifts” coming from ?**

For each altitude bin we counted the number of cases, realizing that the number of occurrences decreases with higher altitudes, as well as the overall number of observations. Therefore, we consider that there is not enough data, and therefore, the shift of the CI threshold towards high values is unrealistic. Moreover, considering previous literature (Sembhi et al. 2012, Spang et al. 2012) we considered correct to stablish a constant CI of 5 for altitudes higher than 12 km.

**32. L. 34, p.8-L.1, p.9: Similar to comment on L. 31-32, p.8.**

The thresholds are altitude dependent, therefore in this case is not possible to provide just one value, as we want to indicate that our threshold in all its altitude range is similar to the ones in the cited literature.

**33. L.3, p.12: It would be interesting to mention the percentage of profiles showing cloud occurrence detected by both methods, to see in which extend these methods have similar performance, or can be considered as complementary. This information would usefully complete the distribution shown in Figure 7.**

The extinction method detects a total of 8247 profiles with a CTH, whereas the CI 7964. Both method present a CTH for the same 7913 profiles, i.e, for ~58% of the total of the profiles. Information added: ‘58% of all profiles show a CTH for both methods, which indicates a similar performance.’ (Page 13, line 9-10).

**34. L. 10-11, p.12: Is there any possible confusion between the occurrences of cirrus clouds and of polar stratospheric clouds ?**

As the polar stratospheric clouds appear during winter, even if some of the flights reach polar latitudes, we do not consider it could be possible because our measurements were taken at the end of summer, beginning of autumn.

**35. L. 14, p.12: Same as comment on L.3, p.12.**

The information about how many profiles are optically thick for both methods simultaneously has been added in page 15, line 2: “36% of all profiles are optically thick for both methods”.

**36. Caption Figure 7: The authors might consider adding, for Fig. 7c, that this plot is discussed in Section 4.3.**

Following this suggestion and also a suggestion from referee 3, Fig.7 has been changed, and also its caption.

“PDFs of CTH as function of equivalent latitude (EqLat) normalized for each altitude bin from (a) the extinction, (b) the CI and (c) ERA5, discussed in Sect. 4.3. The y axis shows the altitude of the tangent points (TgPt). The black line represents the mean tropopause height during September-October 2017 as a function of the equivalent latitude. It was computed from ECMWF analysis data.”

**37. Figure 8: If the distribution shows the number of estimated CTH, I guess it is the same distribution as the distribution of detected cloud occurrences. The integral of this histogram should be about 100%, since all not considered values (values < 0 or > 6 km) are unrealistic, thus supposed to be at worst marginal. However, a first estimate gives a total of ~36% in the case of the extinction method and even significantly less in the case of the CI method. What is wrong? The estimates in L. 18-19, p.12 (31% [20%] of the clouds detected by the extinction [CI] method) look consistent with Figure 8.**

Figure 8 is the distribution of the vertical extent of the observed clouds. Only for optically thin clouds it is possible to define a CBH, and therefore their vertical extent. Thus, the percentage does not add to 100%, as this is not the case for all detected clouds. The percentage given in Fig.8 is over the total number of CTHs (i.e. both optically thick and thin).

**38. Figures in supplement, L. 5, p.4: The supplement includes 15 figures seemly aimed at providing the data for each individual flight. However, flight 1 is missing, and flight 3, already illustrated in Figure 3, is duplicated. Is it what the authors want? Also, the last figure, i.e. Figure S15, corresponds to the 16th flight although a total number of 15 flight is mentioned in L.5, p.4. This should be corrected for the coherence.**

The WISE campaign consist of a total of 16 flights. The first one was a short test flight, with no scientific purpose. Therefore, there is 1 test flight and 15 scientific flights. The analyzed flights are running from the 2<sup>nd</sup> to the 16<sup>th</sup>. To avoid further misunderstandings, this information has been added:

‘With a total of fifteen scientific flights (plus a first test flight) (Fig.1)...’ (Page 4, line 17-18)  
In the supplement we would like to include all 15 scientific flights (F02-F16) to have an overview of all of them.

**37. Caption Figure 10: “all cloud top heights (CTHs) for the extinction method”, for 10a and 10b; “with color code as equivalent latitude”.**

Following the suggestion of referee 3 regarding the color code of Fig. 10, the caption has been modified: “Distribution for (a) all cloud top heights (CTHs) for the extinction method and (b) CTHs for extinction method above the median tropopause ( $TP_{med}$ ). Colors indicate the tangent point altitude (TgPt).”

Technical corrections

**L. 2, p.2: “their detection”**

Modified (now page 2, line 1).

**L. 21-22, p.2: “4-5% for MIPAS at middle latitudes”**

Modified (now page 2, line 21).

**L. 4, p.4: “the data (: : :) were: : :”**

Modified (now page 4, line 16)

# Observation of Cirrus Clouds with GLORIA during the WISE Campaign: Detection Methods and Cirrus Characterization

Irene Bartolome Garcia<sup>1</sup>, Reinhold Spang<sup>1</sup>, Jörn Ungermann<sup>1</sup>, Sabine Griessbach<sup>2</sup>, Martina Krämer<sup>1</sup>, Michael Höpfner<sup>3</sup>, and Martin Riese<sup>1</sup>

<sup>1</sup>Institute für Energie und Klimaforschung (IEK-7), Forschungszentrum Jülich GmbH, 52428 Jülich, Germany

<sup>2</sup>Jülich Supercomputing Centre (JSC), Forschungszentrum Jülich GmbH, 52428 Jülich, Germany

<sup>3</sup>Institute of Meteorology and Climate Research, Karlsruhe Institute of Technology, 76021 Karlsruhe, Germany

**Correspondence:** Irene Bartolome Garcia (i.bartolome@fz-juelich.de)

**Abstract.** Cirrus clouds contribute to the general radiation budget of the Earth, playing an important role in climate projections. Of special interest are optically thin cirrus clouds close to the tropopause due to the fact that their impact is not yet well understood. Measuring these clouds is challenging as both high spatial resolution as well as a very high detection sensitivity are needed. These criteria are fulfilled by the infrared limb sounder GLORIA (Gimballed Limb Observer for Radiance Imaging of the Atmosphere). This study presents a characterization of observed cirrus clouds using the data obtained by GLORIA aboard the German research aircraft HALO during the WISE (Wave-driven ISentropic Exchange) campaign in September/October 2017. We developed an optimized cloud detection method ~~and~~, based on the cloud index and the extinction coefficient retrieved at the microwindow 832.4-834.4 cm<sup>-1</sup>. We derived macro-physical characteristics of the detected cirrus clouds such as cloud top height, cloud ~~top~~-bottom height, vertical extent and cloud top position with respect to the tropopause. The fraction of cirrus clouds detected above the tropopause is in the order of 13 % to 27 %. In general, good agreement with the clouds predicted by the ERA5 reanalysis ~~data-set~~ dataset is obtained. However, cloud occurrence is  $\approx 50\%$  higher in the observations for the region close to and above the tropopause. Cloud bottom heights are also detected above the tropopause. However, considering the uncertainties, we cannot confirm the formation of unattached cirrus layers above the tropopause.

*Copyright statement.* TEXT

## 1 Introduction

High clouds, composed of ice crystals, are formed in the upper troposphere, where the temperatures are lower than  $-30^{\circ}\text{C}$ . ~~It is possible to differentiate three genera: cirrus, cirrocumulus and cirrostratus. The first one consists of white delicate filaments, the second one of banks of small, white flakes and the third one of translucent cloud veils.~~ According to Sassen et al. (2008), these high clouds cover 16.7 % of the Earth's surface on average. All these clouds (from now on simply cirrus) are important, due to their frequent occurrence and their effect on the radiative budget of the Earth (Liou, 1986). Cirrus clouds ~~are rather transparent to incoming solar radiation, but absorb IR radiation from below and emit less to space due to the low temperature~~

of their environment generally have a strong infrared greenhouse effect, leading to warming. However, optically thick cirrus with ice crystals of a few micrometers, can have the opposite effect (Krämer et al., 2016). Thus, they influence the amount of solar radiative energy received and also the loss of energy. These clouds are challenging to measure, because they can appear in multilayered cloud systems and they can be optically very thin, which complicates its detection by nadir sounders that are the typical operational weather satellites their detection by active as well as passive nadir sounders. Whereas in-situ measurements are capable of detecting the thinnest clouds, they only capture a temporally and spatially limited snapshot. Because of these difficulties, and despite being the subject of many studies, processes related to cirrus clouds are still not well understood and cause large uncertainties in climate projections (IPCC, 2013). Important factors influencing these uncertainties are ice water content, crystal number concentration and size distribution (Fusina et al., 2007). Other important factors that are problematic to determine are exact altitude and thickness. According to Sassen and Cho (1992) cirrus clouds are defined as (optically) thick for an optical depth  $\tau > 0.3$ , (optically) thin for  $0.03 < \tau < 0.3$  and subvisible (SVC) for  $\tau < 0.03$  in the visible wavelength region.

Of special interest is the effect of cirrus clouds in the upper troposphere / lowermost stratosphere (UTLS) region. Even small changes in the concentration of water vapor in this region affect the radiative forcing of the atmosphere (Riese et al., 2012). The presence of cirrus clouds above the tropopause, that will evaporate as soon as they experience a temperature increase and thus contribute to the water vapor budget, is still an ongoing discussion. Pan and Munchak (2011) show the importance of the employed tropopause definition and usage of tropopause relative coordinates for this kind of analysis. Using the same set of measurements from the Cloud and Aerosol Lidar While Dessler (2009) indicated the existence of a substantial amount of cirrus clouds above the tropopause, Pan and Munchak (2011), using the same Cloud-Aerosol Lidar with Orthogonal Polarization (CALIOP) as Dessler (2009), they find less occurrences data, demonstrated that the amount of cirrus clouds above the tropopause and consider strongly depends on the definition of the tropopause. Moreover Pan and Munchak (2011) concluded that there is not enough evidence of clouds above the tropopause in mid-latitudes. Spang et al. (2015) use a follow up study by Spang et al (2015), using the measurements from the Cryogenic Infrared Spectrometers and Telescopes (CRISTA) and ERA-Interim temperature fields for the determination of the local tropopause and conclude, concluded that there is a significant number of occurrences in the lowermost stratosphere at mid and high latitudes. A recent study with the Michelson Interferometer for Passive Atmospheric Sounding (MIPAS) and Cloud-Aerosol Lidar and Infrared Pathfinder Satellite Observations (CALIPSO) by Zou et al. (2020) finds that CALIPSO observes found that CALIPSO observed occurrence frequencies of about 2 % of stratospheric cirrus clouds at mid and high latitudes and 4 – 5 % for MIPAS in middle latitudes at mid-latitudes (six year mean global distribution 2006-2012). Other studies based on measurements by ground-based LIDARs lidars show thin cirrus that are unambiguously located in the lowermost stratosphere (Keckhut et al., 2005). In the analysis of Goldfarb et al. (2001) using data from northern mid-latitudes, cirrus cloud tops often occur at the tropopause and SVC constitute 23 % of the total occurrences of cirrus clouds.

Detection of optically thin cirrus clouds and SVCs is a challenge due to the needed high vertical resolution and high sensitivity. This type of clouds is often invisible to nadir viewing instruments, but detectable by limb viewing instruments due to the longer Martins et al. (2011) analyzed CALIOP measurements over 2.5 years and gave an insight into the global

occurrence of SVCs, being more common in the tropics (30-40 %). Reverdy et al. (2012) reported a significant population of SVCs in the tropical upper troposphere. However, Davis et al. (2010) found that CALIPSO would be missing about 2/3 of SVCs with  $\tau < 0.01$ . Due to the long path of the line-of-sight (LOS) through the cirrus, ~~Spang et al. (2008) detect~~, typical of limb instruments, clouds that might be invisible to the nadir viewing instruments, are detectable. Spang et al. (2008) detected optically thin clouds with ice water ~~content~~ ~~contents~~ (IWC) down to 0.01 ppmv using the airborne limb instrument Cryogenic Infrared Spectrometers and Telescopes for the Atmosphere - New Frontiers (CRISTA-NF). This IWC ~~value~~ matches the lower limit of the expected IWC for mid-latitude cirrus clouds 0.01 – 200 ppmv (Luebke et al., 2016). Our study uses data from the airborne Gimballed Limb Observer for Radiance Imaging of the Atmosphere (GLORIA) instrument (Riese et al., 2014; Friedl-Vallon et al., 2014). This instrument possesses the technical characteristics necessary for the detection of thin cirrus and SVCs. It has a spatial ~~resolution~~ ~~sampling~~ of 140 m  $\times$  140 m (horizontal sampling  $\times$  vertical sampling) at a tangent point altitude ~~of~~ (i.e. closest point of the LOS to the Earth's surface) of 10 km for a flight altitude of 15 km. It measures in the infrared spectral region between 780 and 1400  $\text{cm}^{-1}$  and its long ~~line-of-sight~~ ~~LOS~~ provides sufficient sensitivity to low ice concentrations. The mid-IR radiative properties of cirrus clouds depend on particle size, particle shape and the considered wavelength (Baran, 2005; van de Hulst, 1958; Yang et al., 2001). For this study, the configuration of the retrieval of the extinction coefficient is fixed for the microwindow 832.4-834.4  $\text{cm}^{-1}$ .

Our work analyzes the cirrus measured by GLORIA during the Wave-driven ISentropic Exchange (WISE) campaign in September/October 2017 with the purpose of obtaining more information about the nature of cirrus ~~and~~ (both macro-physical and micro-physical properties) and thus, improve the understanding of their formation processes. The analysis includes the macro-physical properties of cirrus clouds, i.e., cloud top height (CTH), cloud bottom height (CBH), vertical extent and their position with respect to the tropopause. The tropopause was computed following the definition of the first thermal tropopause from WMO (1957).

## 2 Datasets and instrument

### 2.1 The instrument: GLORIA

GLORIA is part of the heritage of CRISTA-NF, which was a limb viewing airborne instrument with a vertical resolution of 200 – 400 m and two spectrometers with spectral resolution of  $\approx 2 \text{ cm}^{-1}$  and  $\approx 1 \text{ cm}^{-1}$ , respectively. This instrument represented an important ~~step~~ ~~stepping~~ stone toward future remote sensing limb instruments with even higher vertical and horizontal resolution. The GLORIA instrument and the data processing chain is described in previous studies, therefore the reader is referred to the works of Kleinert et al. (2014), Friedl-Vallon et al. (2014), Riese et al. (2014) and Ungermann et al. (2015) for a more detailed description. Here the main concepts are presented.

GLORIA is an infrared limb emission sounder that combines the Fourier-transform spectroscopy with a 2D infrared detector and measures radiances in the ~~mid-infrared~~ ~~mid-IR~~ range (780 – 1400  $\text{cm}^{-1}$ ). It was designed with the purpose of providing information about trace gases and temperature fluctuations in the observational gap that comprises small-scale structures of less than 500 m of vertical extent and less than 100 km in the horizontal. With GLORIA, it is possible to retrieve the distribution



of different trace gases and aerosols, reconstruct gravity waves and study clouds in the UTLS (e.g. Blank, 2013; Krisch et al., 2018; Höpfner et al., 2019). The high spatial resolution,  $140 \times 140$  m (horizontal sampling  $\times$  vertical sampling) at a tangent point altitude of 10 km and observer altitude of 15 km, and the high precision sensors to obtain a good pointing accuracy, make GLORIA a perfect instrument for ~~measuring-investigating~~ optically and vertically thin cirrus. The instrument is typically

5 configured to use  $48 \times 128$  pixels of its 2D detector array. As the main focus of this study is the characterization of cirrus clouds close to the tropopause and thus the most important feature is the vertical resolution, we do not analyze each individual pixel, but the horizontally averaged spectrum (averaged over 48 pixels) of each line of the 2D array. The final result is one profile for each measured set of interferograms with 128 spectra. The amount of radiance that each pixel receives is determined by the point spread function (PSF). The shape of the PSF is approximated by an Airy-disk with an aperture of ~~2.04~~the instrument of

10 3.6 cm and using  $830 \text{ cm}^{-1}$  as a reference wavelength. This configuration has been computed from a theoretical set-up of the instrument and was validated by cloud top measurements. The vertical sampling is higher the closer the tangent point altitude is to the observer altitude, as the projection of the PSF gets wider the further the tangent point is. For example, if the observer altitude is 14.7 km, at a tangent point of 13 km, the vertical sampling is about 88 m, at 10 km it is about 150 m and at 8 km it is about 179 m.

15 GLORIA always points towards the horizon from the right side of the plane. It is typically configured to one of three measuring modes: one high spectral resolution mode called chemistry mode (CM) and two modes, premier and panorama modes (DM), focusing on dynamical effects in the atmosphere. During ~~the CM~~, the instrument is fixed at  $90^\circ$  with respect to the flight trajectory. During the premier and panorama mode, the instrument changes its viewing direction between  $45^\circ$  and  $135^\circ$  in steps of  $4^\circ$  and  $2^\circ$ , respectively, which gives the possibility of observing the same volume of air from different perspectives

20 and thus allowing for tomographic studies. This capability of GLORIA ~~is-was~~ used for the reconstruction of gravity waves (Krisch et al., 2018) and clouds (Ungermann et al., 2020). Table 1 summarizes the most important technical ~~characteristics~~ features of GLORIA. The data processing chain of GLORIA consists of three stages: the raw data processing (level 0), the processing into geolocated calibrated spectra (level 1) and the retrieval of geophysical quantities leveraging the fast radiative transfer model JURASSIC2 (section 2.4) (Hoffmann et al., 2008; Griessbach et al., 2013; Ungermann et al., 2015). This work

25 uses level 1 and level 2 products.

## 2.2 The campaign: WISE

The data analyzed in this study ~~was-were~~ measured during the WISE (Wave-driven ISentropic Exchange) campaign. It took place in Shannon, Ireland ( $52.70^\circ\text{N}$ ,  $8.86^\circ\text{W}$ ) in September and October of 2017. With a total of fifteen scientific flights (plus a first test flight) (Fig. 1) covering the North Atlantic area, it aims to answer questions related to mixing, the role of Rossby

30 wave breaking events in the transport of trace gases, such as water vapor, the formation of cirrus clouds and several other topics (Riese et al., 2017, last accessed: 13 August 2020). All the measurements were taken onboard the German research aircraft HALO (High Altitude and Long Range Research Aircraft), where GLORIA was placed in the belly-pod. HALO can fly to a maximum altitude of 15 km, which means that the vertical coverage of GLORIA observations during this campaign ~~ranges~~ ranged from  $\sim 15$  km down to  $\sim 5$  km.

**Table 1.** Instrument specifications (Friedl-Vallon et al., 2014). Observer altitude of 15 km and tangent altitude of 10 km.

\*~~Ungermann (2021, in prep.)~~~~(Ungermann, 2021, in prep.)~~

| Property                      | Value                                                        |
|-------------------------------|--------------------------------------------------------------|
| Temporal sampling             | 2 s ( $\approx 0.5$ km)/12.8 s ( $\approx 3.2$ km) for DM/CM |
| Spectral coverage             | 780 – 1400 $\text{cm}^{-1}$                                  |
| Spectral sampling             | 0.0625 $\text{cm}^{-1}$ to 0.625 $\text{cm}^{-1}$            |
| Detector array size           | 256 $\times$ 256 pixels                                      |
| Used detector array size      | 48 $\times$ 128 pixels                                       |
| Vertical sampling             | 0.031°, equal to 140 m                                       |
| Horizontal sampling           | 0.031°, equal to 140 m                                       |
| Vertical spatial coverage     | -3.3° below horizon to 0.8° above horizon                    |
| Horizontal spatial coverage   | 1.5° (=48 $\times$ 0.031°) equal to 6.7 km                   |
| Yaw pointing range            | 45° to 135°                                                  |
| Pointing precision (vertical) | 0.012°, equal to $\approx 50$ m ( $1\sigma$ )                |
| *Pointing accuracy            | 0.1°                                                         |

### 2.3 Meteorological dataset

We used the high resolution ERA5 ~~data-set~~~~dataset~~ provided by the European Centre for Medium-Range Weather Forecasts (ECMWF). The reanalysis data are available at 31 km horizontal resolution at 137 levels from surface to 80 km (Hersbach et al., 2020). The ERA5 dataset provides hourly data for a large variety of meteorological and climate variables. To perform the

5 comparison between model and measurements, the variables of interest were sampled according to the GLORIA measuring geometry, as shown in Fig. 2. This figure represents the limb geometry during one measurement. For every ~~line-of-sight~~  
~~(LOS)~~~~LOS~~, every 30 km, the meteorological variables were computed from the corresponding parameters of the ERA5 data set, i.e. first thermal tropopause (TP), equivalent latitude and ice water content (IWC)~~-~~, i.e. the cloud ice mass in unit volume of atmospheric air. As the signal is integrated along the LOS of the instrument, the same applies for the IWC, thus the final

10 parameter used for the comparison ~~is was~~ the limb ice water path (IWP), i.e. the IWC integrated along the LOS (Spang et al., 2015). In addition, we retrieved the potential vorticity (PV) and equivalent ~~latitudes~~~~latitude~~ from the ECMWF data at the tangent point. The static stability ( $N^2$ ) used to analyze the stability of the atmosphere was computed from GLORIA retrievals. The ~~potential temperature~~~~static stability is the square of the Brunt-Vaisala frequency (N), defined as:~~

$$N = \sqrt{\frac{g}{\theta} \frac{\partial \theta}{\partial z}}, \quad (1)$$

15 where  $g$  is the local acceleration of gravity,  $\theta$  is the potential temperature, and  $z$  is the altitude of the air parcel.  $N^2$  describes the vertical temperature stratification of the atmosphere and gives an insight of if an air parcel is in a transition region between

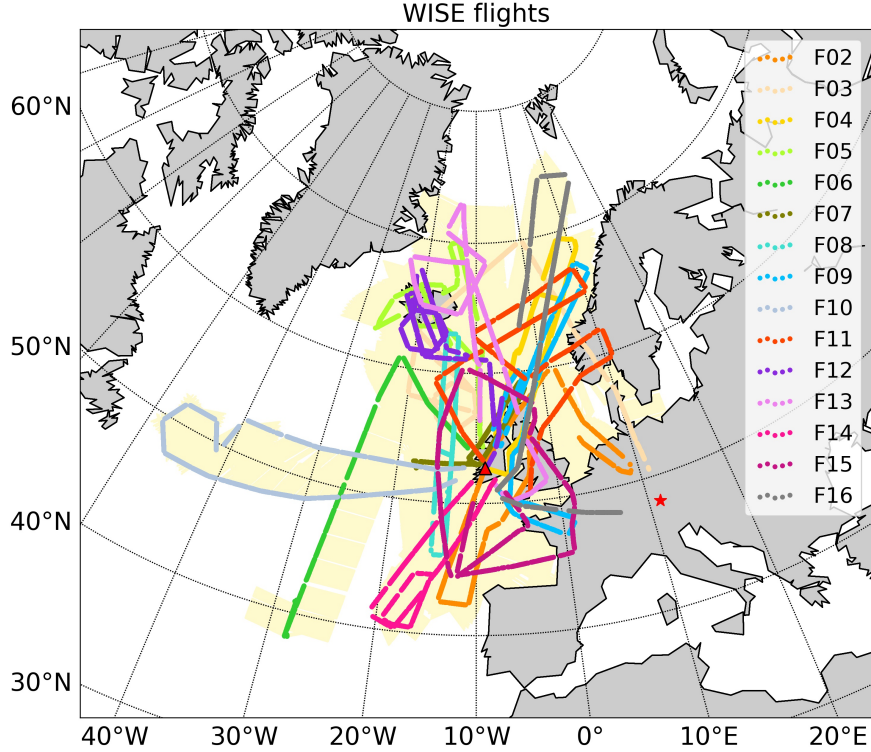

**Figure 1.** Overview of the 15 scientific flights of the WISE campaign. Color points correspond to the positions of HALO with GLORIA measuring. The red star indicates Oberpfaffenhofen, Germany and the red triangle Shannon, Ireland (NASA's Earth Observatory). The shade in light yellow gives a reference of the area covered by the measurements, indicating the distance of the tangent altitude point, i.e. of the closest point of the LOS of the instrument to the surface.

the troposphere, characterized by low  $N^2$  ( $N^2 \approx 1 \times 10^{-4} \text{ s}^{-2}$ ) and the stratosphere, characterized by high  $N^2$  ( $N^2 \approx 5 \times 10^{-4} \text{ s}^{-2}$ ) (Grise et. al 2010).

The potential temperature product needed for the computation of  $N^2$  was computed from pressure and temperature of the final data set, which contains the retrieval results and a priori information taken from ECMWF. The results are dominated by a priori in regions where no measurements are available, i.e., in or below thick clouds.

## 2.4 The model: JURASSIC2

The Juelich Rapid Spectral Simulation Code V2 (JURASSIC2) is a fast radiative transfer model developed at Forschungszentrum Jülich for analyzing the measurements of remote sensing instruments (Hoffmann, 2006) (Hoffmann et al., 2008; Griessbach et al., 2011).

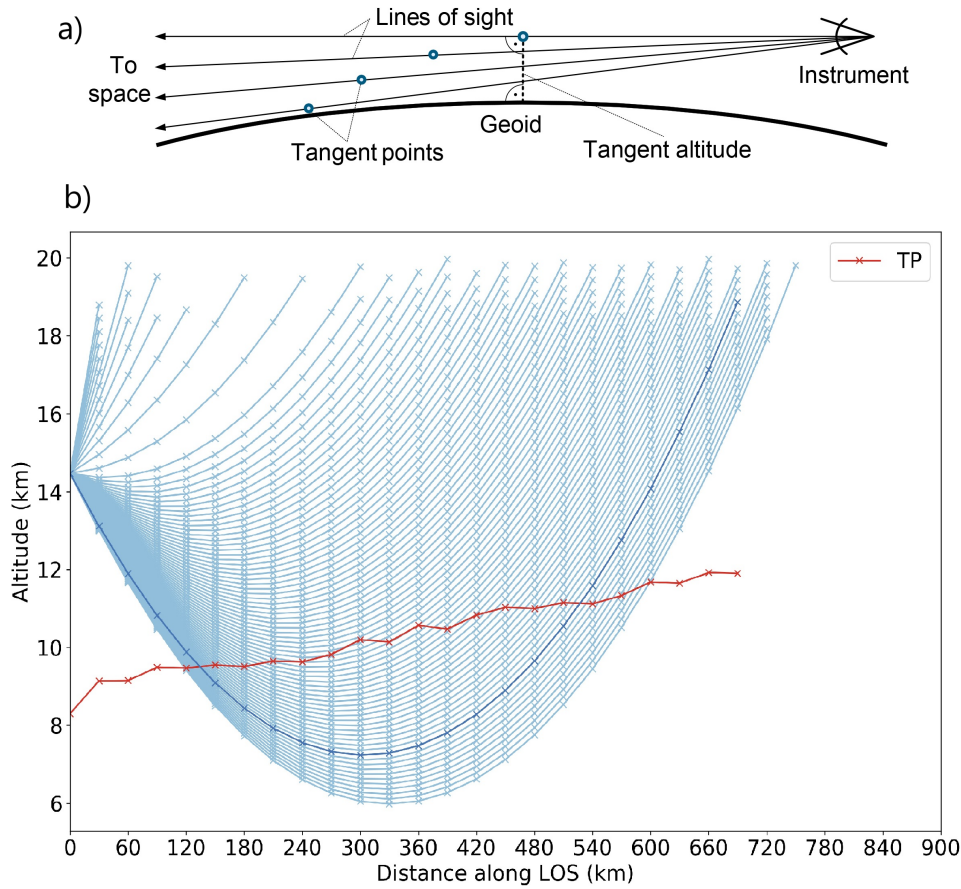

**Figure 2.** a) Example of the measuring geometry of GLORIA. The tangent altitude point is the closest point of the LOS (line-of-sight) to the surface. b) Example of the measuring geometry of GLORIA in a Cartesian system. Each blue line represents a different LOS that corresponds to a different elevation angle. The LOS is not a perfect straight line due to the refraction in the atmosphere and when plotted in a reference system with the Earth's surface as a straight line, it adopts a parabolic form. Each LOS is associated to a different tangent altitude. The horizontal distance of each LOS can extend several hundreds of kilometers. The lowest LOS are the ones with the largest path. The radiance measured by GLORIA is integrated along each LOS and contains the information related to the presence of clouds. The radiance from all lines of sight are recorded simultaneously. The red line indicates the tropopause (TP) from ERA5 along the corresponding line-of-sight (LOS), in dark blue.

. It combines a forward model with retrieval techniques and (for both limb and nadir geometries) and allows us to derive pressure, temperature and trace gas volume mixing ratios among others. JURASSIC2 solves the Schwarzschild Equation in the mid-infrared (Petty, 2006; Wallace and Hobbs, 2006) in the mid-IR region using spectrally averaged radiances, the Curtis-Godson Approximation (CGA; Curtis, 1952; Godson, 1953) and Emissivity Growth Approximation (EGA; Weinreb and

Neuendorffer, 1973; Gordley and Russell, 1981) in combination with emissivity look up tables (LUT) (Ungermann et al., 2011). The LUT are typically computed by the line-by-line Reference Forward Model (Dudhia, 2017).

JURASSIC2, together with the Juelich Tomographic Inversion Library (JUTIL), generates the level 2 products (temperature, trace gases, extinction coefficient). For a detailed description of this process the reader is referred to Ungermann et al. (2015).

- 5 For this study, the level 2 product used is simply the extinction coefficient. An explanation of how it is retrieved is given in Sect. 3.2.

### 3 Cloud detection methods

To analyze the data, two methods to identify optically and vertically thin clouds at high altitudes were used, ~~a~~. One method used the cloud index and the other the extinction coefficient.

#### 10 3.1 Cloud index

The cloud index (CI) was first introduced by Spang et al. (2001) and has been widely used in different studies for the analysis of clouds in the UTLS and polar stratospheric clouds observed by CRISTA and MIPAS (Sembhi et al., 2012; Spang et al., 2015, 2016). The CI is a dimensionless number defined as the ratio between the mean radiances of two microwindows:

$$\frac{I(788.2 - 796.2)\text{cm}^{-1}}{I(832.4 - 834.4)\text{cm}^{-1}} CI = \frac{I_1([788.2, 796.2\text{cm}^{-1}])}{I_2([832.4, 834.4\text{cm}^{-1}])} \quad (2)$$

- 15 The first spectral window is mainly dominated by emissions of a CO<sub>2</sub> Q-branch and the second is an atmospheric window region. The CI is affected by the water vapor continuum contribution to the atmospheric window at low altitudes and depends slightly on latitude and season (Sembhi et al., 2012). When clouds are present, the emission in both ~~microwindow~~ microwindows increases. However, the relative increase in the CO<sub>2</sub> Q-branch is smaller. As a result, the ratio decreases, therefore ~~low values of CI indicate~~ a low CI indicates cloudy conditions. A  $\sim 1.1 < CI < 4$  indicates the presence of clouds (Spang  
20 et al., 2008, 2015).

#### 3.2 Extinction coefficient retrieval

The extinction coefficient (from now on simply extinction) was retrieved with JURASSIC2. Although scattering by cloud particles has an impact on the measured radiance (Höpfner and Emde, 2005), we simulated the radiative transfer without scattering. As explained by Höpfner and Emde (2005) the difference between zero scattering and multiple scattering for a case

- 25 that falls between the two cases presented in their study ( $\omega_0 = 0.24$  and  $\omega_0 = 0.84$ ), would be between 25-28 %. Additionally, we performed test runs with single scattering for two flights using the radiative transfer model JURASSIC2. ~~The difference~~ These flights were selected because both thin cirrus and thick cirrus were observed, and therefore, constitute an interesting case for studying the influence of scattering in different cases. The difference (calculated as the mean of the median difference of both flights) between the extinction neglecting scattering and the extinction including single scattering is 21 %, with 73 % as  
30 the percentile 95 and -86 % as the percentile 5 (results not shown). ~~We considered~~ The mean difference at  $2\sigma$ , i.e percentile

16 and percentile 84 is -4 % and 49 %, respectively. For the retrievals with single scattering, the CTH was computed following the same procedure as for the retrievals with no scattering. For 98 % of all cases, both retrievals detected a cloud. The altitude of the CTH was for about 71 % of the detected clouds the same, being the typical difference 0-0.375 km. Following the same procedure for the CBH, for 90 % of all cases, both retrievals detected a CBH, obtaining the same altitude in 58 % of the coincidental profiles. The typical difference for the CBH was also 0 – 0.375 km. The detected clouds for both flights and both retrievals covered the range 45°N – 75°N, with the largest occurrence between 55°N – 75°N. In consideration of these results, we conclude that for our current purpose of obtaining macro-physical properties of cirrus clouds the non-scattering approach is sufficient.

Obtaining the extinction means solving an ill-posed inverse problem. In our inverse problem, there is a state vector  $\mathbf{x}$  describing the state of the atmosphere (quantities to be retrieved), a measurement vector  $\mathbf{y}$  with error  $\epsilon$ , and a forward model  $\mathbf{F}$  implementing the physics of the involved processes.

$$\mathbf{y} = \mathbf{F}(\mathbf{x}) - \epsilon \quad (3)$$

For this work,  $\mathbf{x}$  is the extinction and  $\mathbf{y}$  is the radiance in the microwindow 832.4 – 834.4  $\text{cm}^{-1}$ . This interval is the same one used for the CI. For a detailed explanation of the retrieval the reader is referred to Ungermann et al. (2015).

The retrieval grid consists of a constant altitude grid with 81 levels ranging from 6 km to 16 km with a sampling distance of 0.125 km. The model includes corrections of the tangent altitudes due to the elevation angle offset and the refraction. Several tests comparing the radiance of a theoretical case of a cloud as a step function and the retrieved one were performed to determine the influence of the radiance of cloudy pixels on the pixels above (not shown), i.e. the effect of the PSF. The results show that the retrieved profiles are affected by Gibbs oscillations that cause ringing artifacts at the edges and an overshoot of  $\approx 10\%$  is found (i.e. radiance value larger than the maximum of the step function). These effects can cause an error in the determination of the cloud top height of one grid point ( $\pm 125$  m). These oscillations could also affect the determination of the cloud bottom, creating a false detection of a thin layer (1 – 2 pixels grid points) above a thick cloud in  $\approx 1\%$  of all the cloudy profiles. The leading error term in the determination of the cloud top altitude is the pointing knowledge along the LOS. This error is about a tenth of a degree, which has been was validated by measurements of the Moon during several flights (Ungermann, 2021, in prep.).

The range of retrievable ~~extinction values for clouds~~ cloud extinctions is from about  $2 \times 10^{-4} \text{ km}^{-1}$  to  $4 \times 10^{-2} \text{ km}^{-1}$  and allows for the detection of optically thin cirrus, one of the objectives of this study. The upper limit is determined by the optical thick conditions in the limb direction and the lower limit by background aerosol and calibration uncertainties.

We sampled the CI on the extinction retrieval grid to allow for a comparison of both methods (Fig. 3). The radiative transfer model assumes for practical reasons a horizontal homogeneous atmosphere. As such, it assumes that simulated measurement rays diving below a cloud layer passes through the cloud twice, whereas in the actual situation it may 'miss' the cloud on both occasions; if this occurs, the retrieval assigns nonphysical low extinction values close to 0 to those regions (Fig. 3a, e.g. at 11:29 UTC, 11 – 12 km). Above the clouds (0.125-0.250 km), the low extinction is due to the second order regularization that smooths the profiles and causes Gibbs oscillations in the extinction profile at strong ~~value~~ extinction changes. For the CI



cross-section (Fig. 3b), depending on the altitude, different CI threshold values indicate the presence of clouds. A detailed explanation about the detection threshold is found in Sect. 3.3.

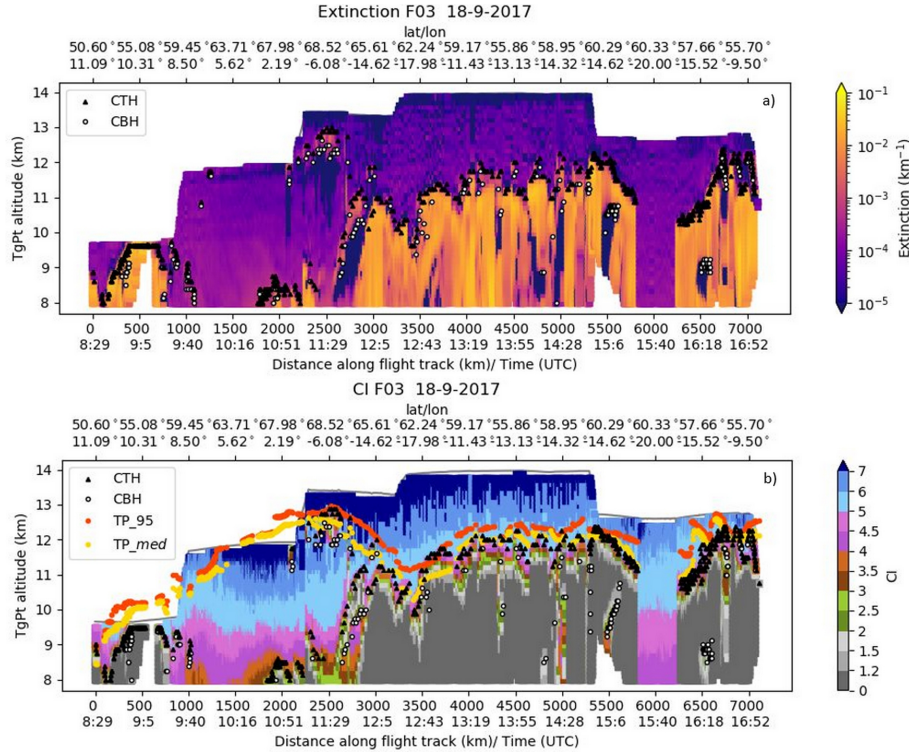

**Figure 3.** Cross-sections of extinction (a) and cloud index (b) for flight 3 of the WISE campaign. The results are restricted to levels below flight path. (a) Color code for extinction in  $\text{km}^{-1}$ . Orange-pink colors indicate the presence of clouds; (b) color code for CI. Depending on the altitude, CI values below 2 to 5 (colors from grey to pink) indicate the presence of clouds. Median tropopause ( $\text{TP}_{\text{med}}$ ) and the percentile 95 of the tropopause ( $\text{TP}_{95}$ ) are represented with orange and yellow circles, respectively. Cloud top height (CTH) and cloud bottom height (CBH) are represented with a black triangle and with a white circle, respectively. The altitude of the tangent points (TgPt) is the y axis. The white areas in both cross-sections correspond to a first filtering of optically thicker regions ( $\text{CI} < 2$ ). These areas correspond to the tangent layers where the clouds are optically too thick.

### 3.3 Detection threshold for CI and extinction

To identify clouds in the measurements, we defined the detection thresholds for CI and extinction. First, we ~~define~~ defined the criteria for clear sky regions. As a first approximation of clear sky conditions, profiles with CI always greater than 2 and extinction always less than  $10^{-3} \text{ km}^{-1}$  were selected. From this first coarse pre-selection, the vertical extinction gradient (Fig. 4) was computed to have an automated method that is more sensitive to optically thin clouds. If this gradient has a small variability, that means there are no elements, i.e aerosols or cloud particles, that cause a sudden increase in the extinction and therefore

a large gradient. Clear sky profiles were defined to be those with an extinction gradient lower than a threshold defined as the median extinction gradient of the pre-selected profiles of all flights together plus  $5\sigma$ . A value of  $5\sigma$  was chosen after a visual fit to the gradient to reduce the number of false detections to a minimum. It is possible that the aircraft flies inside a cloud, which causes the vertical gradient of the extinction to be approximately constant and thus considered as clear sky. To exclude these cases, the condition that the CI must always be greater than 2 was added. Below 8 km the extinction gradient increases, which indicates the influence of the water vapor continuum at low altitudes (Fig. 4). Therefore, the analysis was limited to the range from 8 km to the aircraft altitude. For all the clear sky profiles, PDFs—probability density functions (PDFs) of CI and

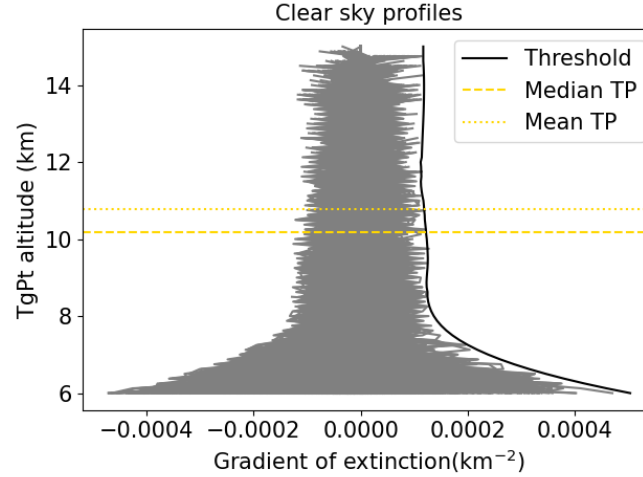

**Figure 4.** Clear sky profiles of the vertical gradient of the extinction coefficient for all flights together in the case of clear sky conditions. In black, the threshold defined as the median of the extinction gradient plus  $5\sigma$ . Altitude of the tangent points (TgPt) in the y axis. The median tropopause height (Median TP) and the mean tropopause (Mean TP) height of all clear profiles is indicated by a dashed and a point yellow line, respectively.

extinction were calculated and normalized for each altitude bin. Using the PDF for guidance, a threshold for each parameter **is** **was** defined. The extinction coefficient threshold ( $k_{\text{thres}}$ ) was defined as the median of the extinction plus  $5\sigma$ . This threshold is sensitive to structures with very low extinction, down to  $2 \times 10^{-4} \text{ km}^{-1}$  for a tangent point between  $\sim 11.5 \text{ km}$  and  $15 \text{ km}$ . **This value** (Fig. 5a, b). **This detection limit** is similar to the one provided by Sembhi et al. (2012) for MIPAS, with an extinction detection limit above 13 km of  $10^{-4} \text{ km}^{-1}$  and to the findings of Griessbach et al. (2020), **specified in Table 1 of the cited study**. The CI threshold ( $\text{CI}_{\text{thres}}$ ) is the percentile 1 (%) shifted by 0.3 (CI). Above 12 km we applied a constant **CI-value-CI** of 5 because there, the low number of **counts observations and occurrences of clear sky** shifts the threshold towards too high **values of CI**. **This value, as well as the threshold for lower altitudes, CI numbers. Our threshold for this and lower altitudes** agrees with the one defined by Sembhi et al. (2012) for northern mid-latitudes and Spang et al. (2012) for the MIPAS instrument. The threshold lines separate the clear air and cloudy cluster from each other, following the vertical gradient of the clear air cluster



(Fig. 5)-a, b). As seen in Fig. 5c, the relation between CI and extinction is not one-one. However, for CI between 3 and 5, which corresponds to optically thin clouds (Spang et al., 2008), the relation is stronger.

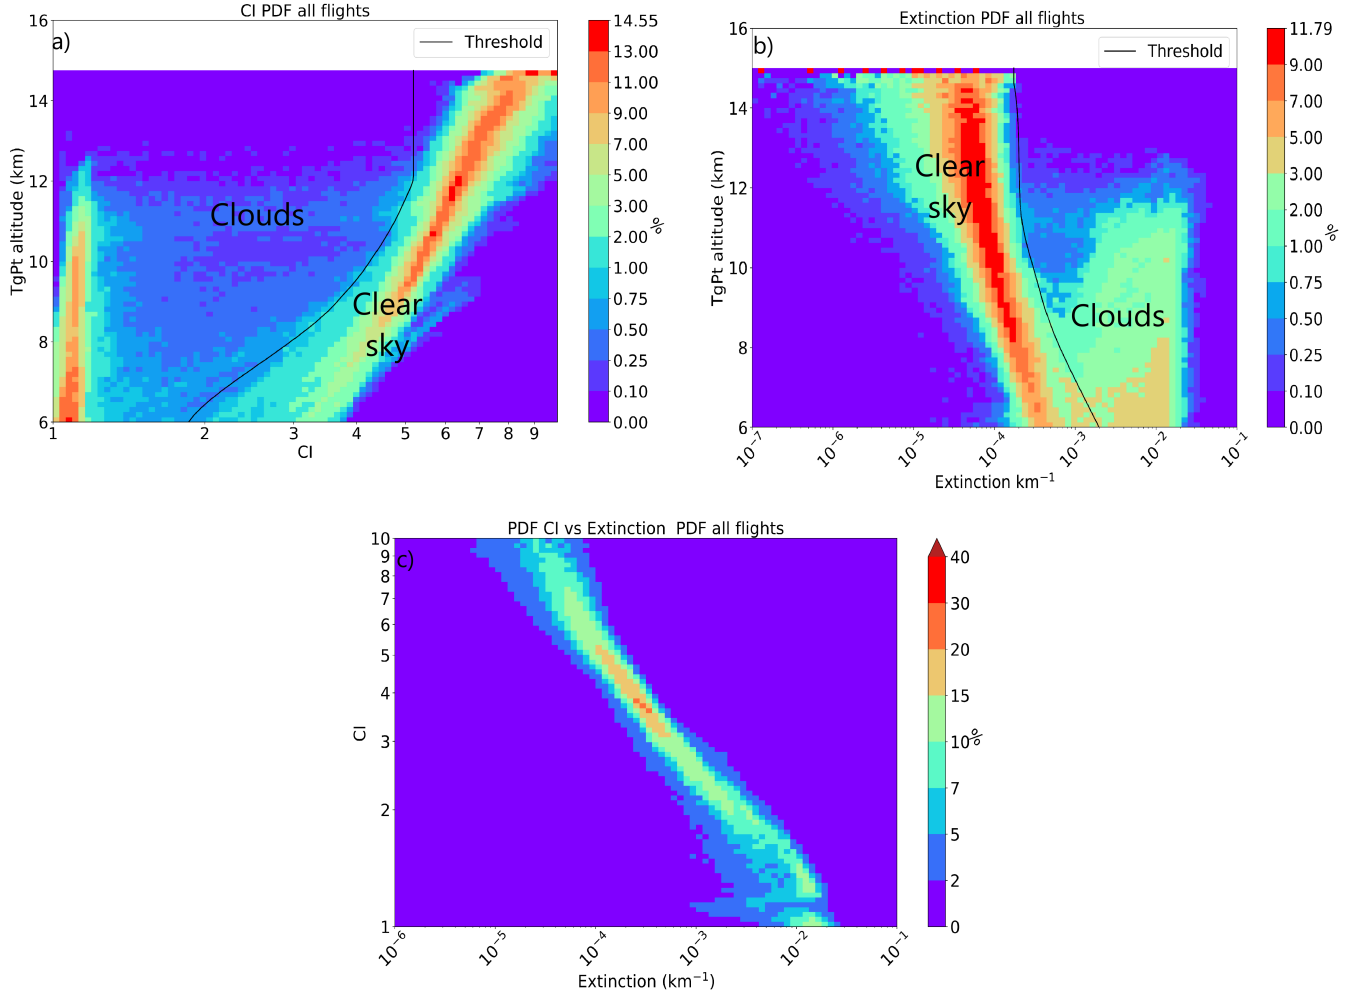

**Figure 5.** PDF for CI and extinction for all flights including all profiles. The bins are normalized by altitude. In black the threshold for differentiating cloudy conditions from clear sky. For (a) clouds correspond to small values of CI, i.e., the left side of the  $CI_{thres}$ . For (b) clouds correspond to high extinction values, i.e., to the right side of the  $k_{thres}$ . The altitude of the tangent points (TgPt) is the y axis. c) PDF of CI as a function of extinction, normalized by CI. The total number of analyzed profiles is 13539.

### 3.4 Definition of the macro-physical characteristics

Here, we define the macro-physical characteristics of the detected cirrus clouds that are presented in Sect. 4: cloud top height (CTH), cloud bottom height (CBH) and their vertical extent. In the limb geometry, the position of the cloud along the LOS is

not exactly known. For analyzing the data, the clouds were referred to the tangent point, i.e., the point of the LOS closest to the Earth's surface and the corresponding tangent height layer. Using this definition of the position of the cloud, the CTH was defined as the first point in which the extinction (or CI ~~has a value is~~ equal to or larger than the  $k_{\text{thres}}$  (or less than or equal to the  $CI_{\text{thres}}$ ). For the analysis, we assumed a homogeneous cloud layer, which may underestimate the real extinction. This could

5 cause an underestimation of the CTH for some cases, in which the cloud is on the ray path far from the tangent point location (Kent et al., 1997). All the CTHs belong to the first cloud detected, i.e., the analysis did not include multi-layer clouds (two or more clouds with a clear separation in between). The CBH of a cloud using the extinction method is the altitude of the first

~~point detection in the series of limb observations~~ with an extinction smaller than the  $k_{\text{thres}}$ ; this ensures the identification of an altitude at or below the true cloud bottom. For the CI method, the CBH was computed using the minimum of the CI gradient

10 of the profile (Kalicinsky et al., 2020). CBH could only be reliably determined for optically thin clouds. For optically thick conditions, the CI profiles saturate and the extinction profiles decrease in an unrealistic manner. Optically thick profiles are characterized by ~~CI-values CI~~ lower than 1.2 from an altitude  $h$  down to the lowest altitude (Spang et al., 2015, 2016). ~~Thin profiles~~ Optically thin profiles, i.e. with small extinction, are those for which it was possible to define a CBH. Figure 6 shows an example of a saturated CI profile and a profile for a cloud layer. It is possible to observe how the ~~saturated CI~~ profile reaches

15 saturation ~~after CI =~~ for CI's smaller than 1.2. The last macro-physical characteristic that was analyzed is the vertical extent, defined as the CTH – CBH.

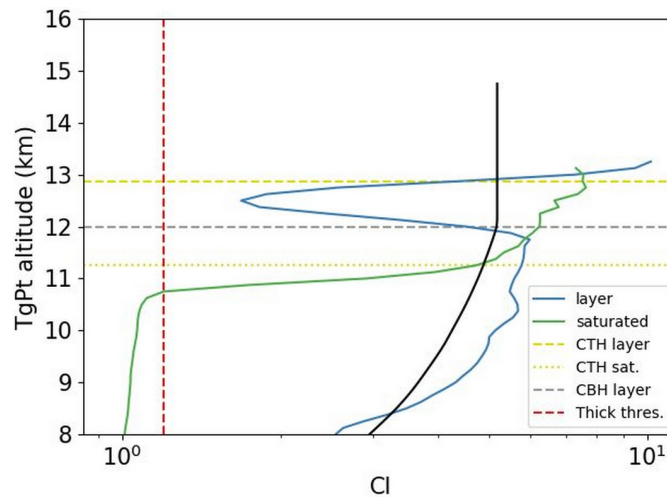

**Figure 6.** CI profile for a cloud layer (blue) and an optically thick case (green) that saturates. The horizontal yellow lines indicate the cloud top height (CTH) for the layer (dashed line) and the thick case (~~dashed-point points~~ line). The horizontal dashed line in grey is the cloud bottom height (CBH) of the cirrus layer. The red vertical line corresponds to  $CI = 1.2$  i.e. optically thick cases. In black, the CI threshold. The altitude of the tangent points (TgPt) is the y axis.

### 3.5 Differentiation between clouds and aerosol

Enhanced aerosol number densities can also affect the CI ~~values~~ and cause false cloud detection. To investigate if the presence of aerosol particles influenced the results, methods described by Griessbach et al. (2014) and Griessbach et al. (2016) were applied. These methods use the different ~~spectral-slopes-wavelength dependence~~ of ice and aerosols, such as volcanic ash or sulfuric acid, in five wavelength regions to establish thresholds that differentiate them. The results (not shown), indicated very little influence of these aerosols in our measurements.

## 4 Results

### 4.1 Analysis: cloud top height and cloud bottom height

During the WISE campaign, 61% of all observed profiles show CTHs using the extinction method and 59% for the CI. ~~These values-58 % of all profiles show a CTH for both methods, which indicates a similar performance. These fractions~~ are comparable to the climatology presented in Goldfarb et al. (2001) for lidar observations, with a cirrus occurrence frequency of 60% for fall. However, ~~a fraction of 60% is considerably larger than the  $\approx 17\%$  reported by Sassen et al. (2008) for CALIPSO measurements and the International Satellite Cloud Climatology Project (ISCCP) for mid-latitudes. It is rather unlikely that this difference is related only to the disparate observational periods. We rather explain it by the differences in cirrus cloud selection criteria of the studies. While in our study there is no temperature threshold, Sassen et al. (2008) considered as cirrus only clouds with  $\tau < \sim 3.0 - 4.0$  and with a maximum cloud top temperature of  $-40^\circ\text{C}$ . Goldfarb et. al 2001 considered for the detection of cirrus a threshold that was defined for each nightly determination and required that the cloud layer was in an air mass with a temperature of  $-25^\circ\text{C}$  or lower.~~

The extinction method and the CI method show good agreement in the determination of the CTHs, presenting a similar distribution (Fig. 7 a and b). The CTHs between 8 and 10 ~~km-present~~ km ~~were observed in air masses with~~ equivalent latitudes that spread from tropical to polar regions, having a slightly higher frequency at the polar latitudes. ~~For~~ CTHs between 10 km and about 12.5 km ~~the air masses have an often occurred at~~ equivalent latitude typical ~~of for~~ mid-latitudes, whereas the ~~highest CTHs-, CTHs~~ above about 12.5 km ~~are almost subtropical-were related to subtropical latitudes~~. The main difference between both methods is ~~the-that the CTHs inferred from the CI are~~ slightly higher (1 – 2 ~~pixels)-CTHs of the CI grid points~~) than for ~~the extinction~~ method.

~~Considering all observed profiles~~ From all considered profiles (13539), about 39 % ~~are~~ (5232 profiles) can be characterized as optically thick using the extinction method and 41 % (5517 profiles) the CI method. ~~36 % of all profiles are optically thick for both methods.~~ The maximum extinction detected for thin clouds, in which a CBH was possible to determine, is  $4 \times 10^{-2} \text{ km}^{-1}$ .

The distribution of the vertical extent of clouds is presented in Fig. 8. The extinction method results in a higher amount of vertically thin clouds than the CI method, due to the slightly higher CBHs of the extinction method (Ungermann et al., 2020). For both methods, a large fraction of the optically thin cirrus clouds ~~have-were~~ located between  $45\text{-}65^\circ\text{N}$  and had a vertical extent smaller than 1.5 km (31 % of the clouds detected with the extinction method and 20 % of the clouds detected

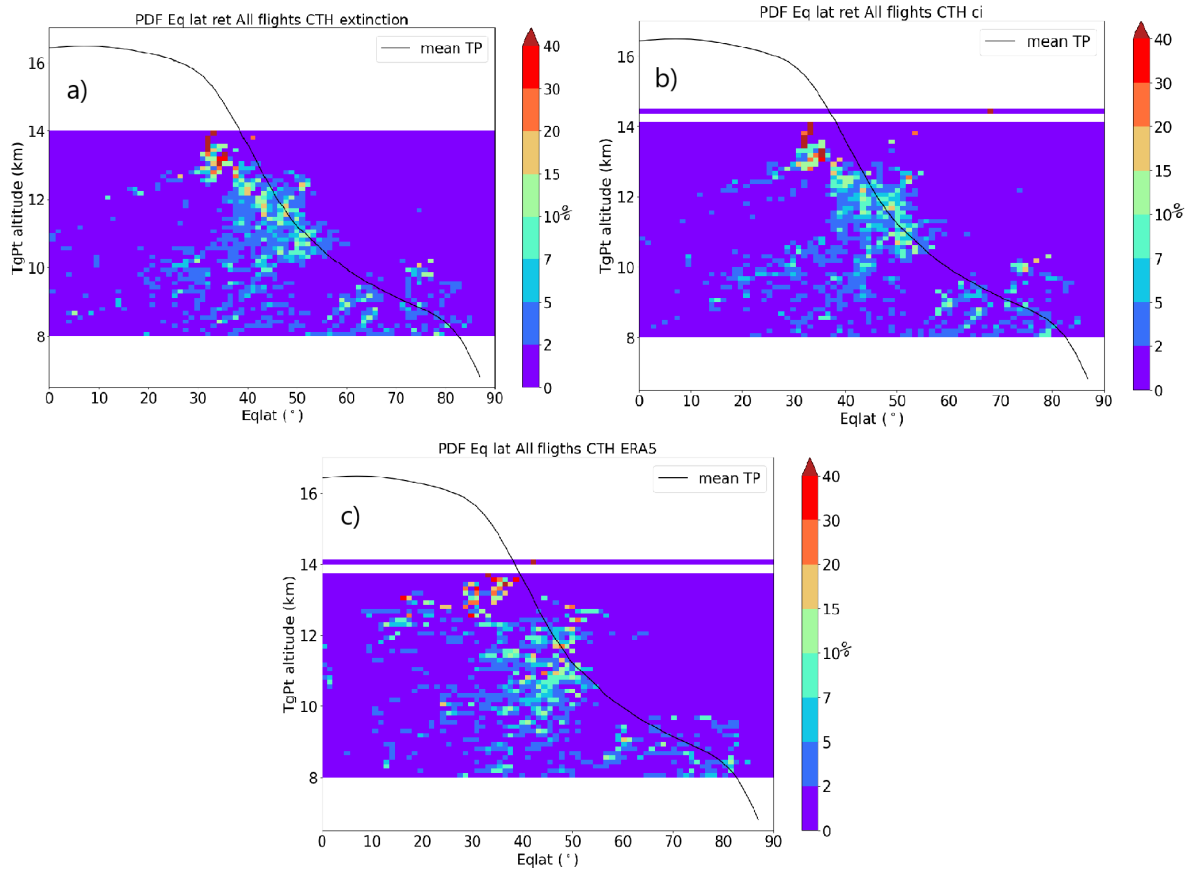

**Figure 7.** PDFs of CTH as function of equivalent latitude (EqLat) normalized for each altitude bin for from (a) CTH detected with the extinction, (b) CTH detected with the CI and (c) CTH from ERA5, discussed in Sect. 4.3. The y axis shows the altitude of the tangent points (TgPt)is. The black line represents the y-axis mean tropopause height during September-October 2017 as a function of the equivalent latitude. It was computed from ECMWF analysis data.

with the CI method). These results are qualitatively similar to the findings of Noël and Haefelin (2007). They show showed that between May and November the vertical extent distribution frequency distribution of the vertical extent of the observed clouds is was biased towards values between 0 and 1.5 km. Our results are also in agreement with the mean layer thickness of 1.4 km computed found by Goldfarb et al. (2001).

## 5 4.2 Cloud top position with respect to the tropopause

The occurrence frequency of cirrus clouds above the tropopause remains a matter of debate. The vertical resolution of the underlying temperature profile of the meteorological analysis for the tropopause computation is a key point for respective

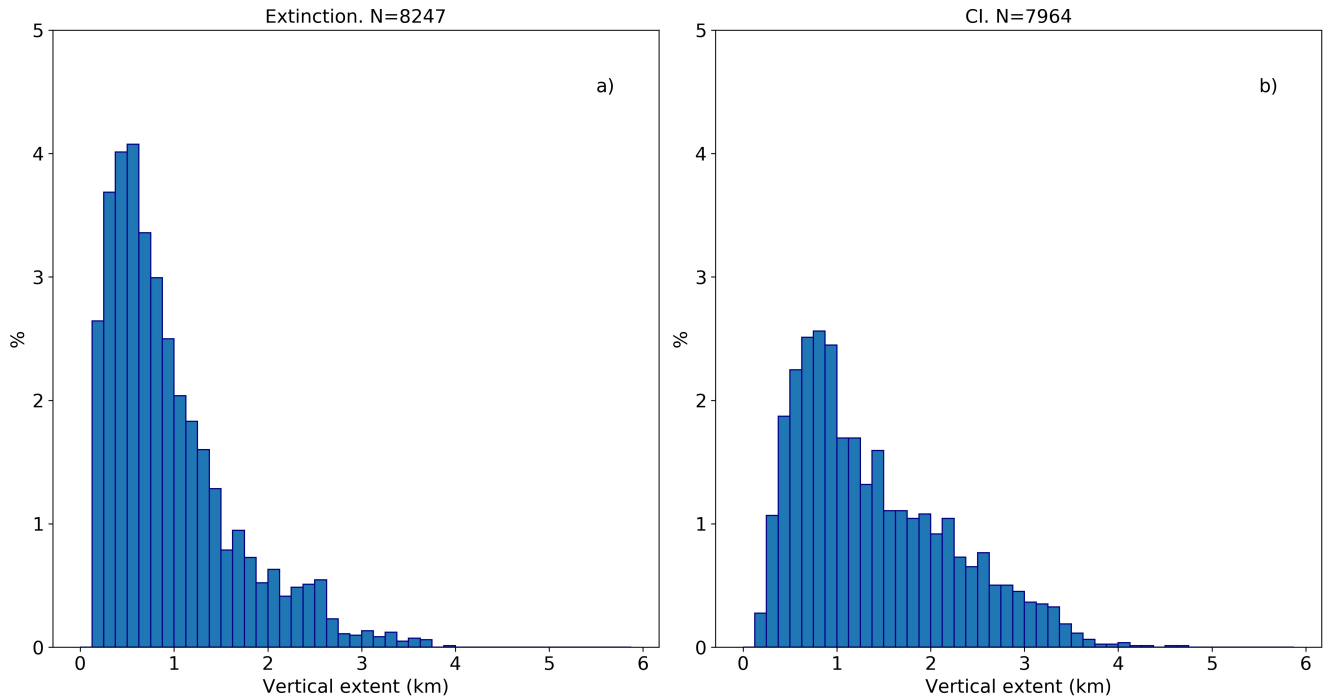

**Figure 8.** Distribution of the vertical extent of cirrus clouds for all flights for (a) the extinction method and (b) the CI method. The percentage is given in relation to the total number of CTHs (N) detected for each method.

analyses. As discussed in Pan and Munchak (2011) different definitions of the tropopause can lead to different results. For this study, the first thermal tropopause altitude was computed from ERA5 data. The LOS of GLORIA typically extends several hundreds of kilometers ~~sampling air masses that can be heterogeneous. Consequently, hence the sampled air masses could be~~ heterogenous in the horizontal. Further, the tropopause ~~is usually height was~~ not constant along the LOS (Fig. 2). Two methods

5 were ~~applied-used~~ for representative tropopause definition for the air mass sensed by the instrument: a) the median of the tropopause along the corresponding LOS of the CTH and b) the 95 % percentile. All extinction and CI cross-sections of the WISE campaign with CTHs, CBHs, median tropopause ( $TP_{med}$ ) and 95 % percentile ( $TP_{95}$ ) can be found in the supplement. Figure 3 illustrates the case of a flight with both homogeneous and heterogeneous air masses. E.g. the air mass at 16:18 UTC ~~is-was~~ homogeneous and  $TP_{med}$  and  $TP_{95}$  are close to each other (less than 125 m apart). At 11:29 UTC, there ~~are-were~~

10 heterogeneous air masses with  $TP_{med}$  and  $TP_{95}$  separated (three times the distance of the previous example), which affects the statistics of CTHs above the tropopause, since as to whether the CTH is located above or below the tropopause ~~depending~~ depends on the chosen tropopause altitude.

For the extinction method, the frequency of occurrence of CTHs above the  $TP_{med}$  is 24 % of the total number of observations, whereas for the CI method the ratio is 27 % (Fig. 9b). The  $\approx 3\%$  difference is due to the CI detecting CTHs slightly higher

15 than the extinction method. When considering  $TP_{95}$ , the percentages decrease to 13 % and 16 % respectively as it uses a more

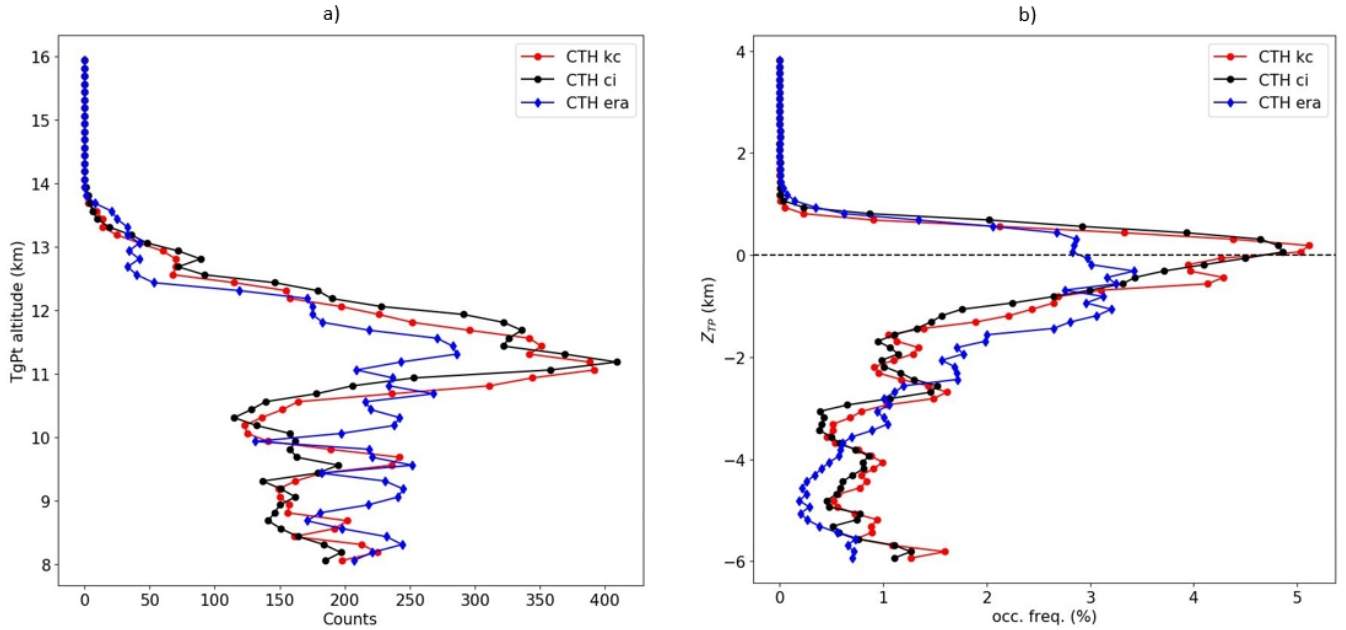

**Figure 9.** (a) Number of cloud top heights (CTH) per altitude bin for the extinction method (*kc*) in red, the CI method (black) and ERA5 (blue). The altitude of the tangent points (TgPt) is the y axis. (b) The same as a) but using as coordinates the distance of the CTHs to the tropopause in km ( $Z_{TP}$ ). The used tropopause is the median tropopause ( $TP_{med}$ ). The three profiles ~~have been~~ were smoothed with a three points running mean.

conservative criterion. This gives confidence to conclude that CTHs above the lapse rate tropopause were detected, even when considering the error in the CTH determination, which is in the order of  $\pm 125$  m. Figure 10 shows the distribution of all CTHs ~~and~~ (Fig. 10a) and the distribution of CTHs above  $TP_{med}$  (Fig. 10b) for the extinction method. As can be seen, most of the occurrences of CTHs above  $TP_{med}$  were found between 50-70° N, with varying altitudes from 8-13 km. The few occurrences

5 between 35-50° N were located at higher altitudes, from 10-14 km. About 6 % of all profiles show for both methods CTHs above the  $TP_{med}$  and are classified as optically thin. The ratio of clouds with both CTH and CBH above the  $TP_{med}$  is 2 % for the extinction method and 1 % for the CI method. When considering the  $TP_{95}$ , both ~~percentages~~ occurrences decrease but still ~~deteet~~ CBHs above the TP were detected. The presence of complete layers above the tropopause is inconclusive, ~~as~~ since these CTHs and CBHs are ~~in general just only separated by~~ one altitude bin ~~apart~~ and the CBH is only one or two altitude bins

10 above the tropopause, which is within the uncertainties of the CBH. In Sect. 4.4, a potential case of a cloud layer above the tropopause is discussed in more detail. Our results (summarized in Table 2) agree with previous studies that claim the detection of CTHs above the tropopause for mid-latitudes. Goldfarb et al. (2001) used lidar ground based instruments and found 5 % of CTHs at least 1 km above the tropopause, and approximately 15 % above 0.5 km. Spang et al. (2015) analyzed CRISTA data ~~(Spang et al., 2015) and concluded with a~~ and concluded to a 5 % frequency of occurrence of ~~5 cirrus clouds~~ (of all observa-

15 tions and Zou et al. (2020) obtained) and Zou et al. (2020) inferred their occurrence to 2 % for CALIPSO data and 4 – 5 % for

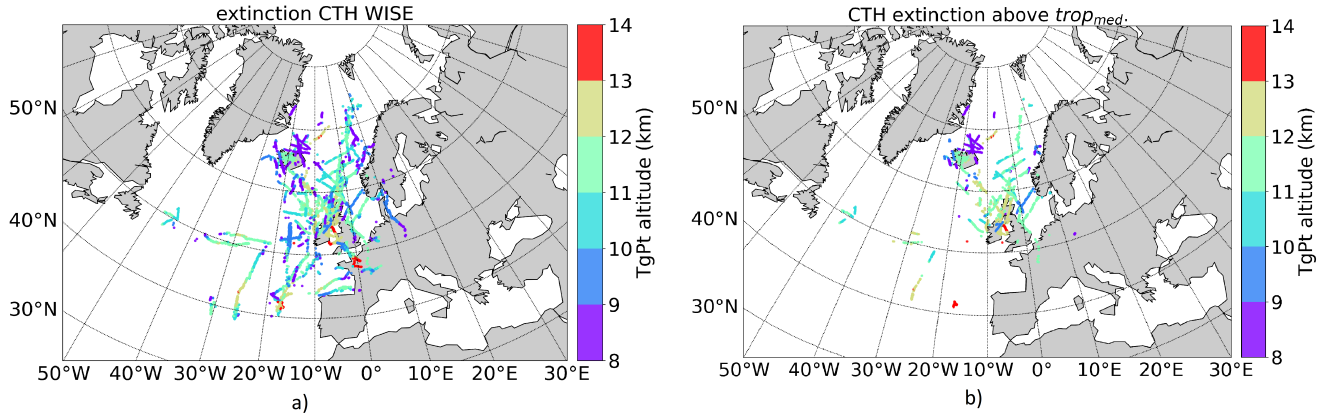

**Figure 10.** Distribution for (a) all cloud top heights (CTHs) for ~~extinction-with-color-code-as-the tangent point altitude in km (TgPt) extinction method~~ and (b) CTHs for extinction ~~method~~ above the median tropopause ( $TP_{med}$ ) ~~with color-code equivalent latitude~~. Colors indicate the ~~tangent point altitude ( $E_{qLatTgPt}$ )~~.

MIPAS data. The analyses of Spang et al. (2015) and Zou et al. (2020) used the criterion of the cirrus CTH being 0.5 km above the ~~tropopause derived from~~ ERA-Interim ~~thermal tropopause~~. Using the same criterion, the frequency of occurrence is 4 % for CTHs above the  $TP_{med}$  for the extinction method and 7 % for the CI method. These ~~values-occurrence frequencies~~ are comparable to ~~the ones of the literature~~ ~~those reported in the literature~~ (Goldfarb et al., 2001; Spang et al., 2015; Zou et al., 2020).

- 5 However, as we used ERA5 data, which has a better vertical resolution than ERA-Interim, the equivalent criterion would be ~~to mandate the cirrus CTH to be located~~ 0.25 km above the tropopause. In this case, the frequency of occurrence increases to 13 % above the  $TP_{med}$  for the extinction method and to 17 % for the CI method. We explain ~~the-these~~ differences in the frequency of occurrence by different periods being compared, the sensitivity and vertical resolution of the instruments, the uncertainty of the meteorological data used to estimate the tropopause height and the definition of stratospheric cirrus used in each study.

#### 10 4.3 Comparison with ERA5

We compared our CTH detections with the ERA5 ~~data-set-dataset~~ by applying the observation geometry of GLORIA. As explained in Sect. 2.3, one of the ~~variables-parameters from ERA5~~ sampled following the viewing geometry of the GLORIA instrument, is the IWC ~~for-ERA5~~, which when integrated along the LOS results in the limb IWP. Spang et al. (2012) showed that CI and the limb IWP divided by the effective radius of the particles size distribution are very well related to each other. This ~~is caused by the fact that-since~~ for large particles (with respect to the wavelength) the observed cloud radiances are determined by the integrated surface area along the LOS, in contrast to the volume density for small particles. We defined a CTH for the ERA5-based ~~data-set-dataset~~ to each tangent point with IWP > 0.

**Table 2.** ~~Percentage with respect to all retrieved profiles~~ Percentages of cloud top heights (CTHs) and cloud bottom heights (CBHs) detected above the median tropopause ( $TP_{med}$ ) and the percentile 95 of the tropopause ( $TP_{95}$ ) ~~relative to all retrieved profiles~~ for both detection methods. ~~The last three rows correspond to the frequency of occurrence of stratospheric cirrus from the studies of Goldfarb et al. (2001), Spang et al. (2015) and Zou et al. (2020).~~

|                                   | $TP_{med}$                   | $TP_{med}$       | $TP_{95}$ | $TP_{95}$ |
|-----------------------------------|------------------------------|------------------|-----------|-----------|
|                                   | CI                           | ext              | CI        | ext       |
| CTH all                           | 27                           | 24               | 16        | 13        |
| CTH thin                          | 7                            | 7                | 5         | 4         |
| CTH and CBH                       | 1                            | 2                | 1         | 1         |
| <del>Goldfarb et al. (2001)</del> | <del>Lidar &gt; 1 km</del>   | <del>5</del>     |           |           |
|                                   | <del>Lidar &gt; 0.5 km</del> | <del>15</del>    |           |           |
| <del>Spang et al. (2015)</del>    | <del>CRISTA</del>            | <del>5</del>     |           |           |
| <del>Zou et al. (2020)</del>      | <del>CALIPSO</del>           | <del>2</del>     |           |           |
|                                   | <del>MIPAS</del>             | <del>4 - 5</del> |           |           |

Figure 7c shows a similar ~~distribution of CTHs in~~ pattern of CTHs inferred from ERA5 data as ~~the one those~~ derived from the measurements. ~~The fraction of CTHs detected in ERA5 is about~~ From all investigated profiles, the fraction of detected CTHs is 59 % of all profiles, the same as the one of the CI method (from ERA5, 59 % ) ~~and only slightly lower than the fraction for the extinction method (using the CI method and 61 % )~~the extinction method. Figure 9a shows that between 8 and 11 km altitude, ERA5 indicates more frequent CTHs than the observations. This could be related to ~~not considering discarded~~ multi-layer clouds in the detection algorithm, which ~~would mean could~~ increase the number of CTHs observed between 8 and 11 km, ~~as also CTHs below the first CTH of the multi-layer cloud would be included~~. The instrument is sensitive to higher and thinner cirrus clouds than the clouds assimilated by ERA5. Consequently, high CTHs detected by GLORIA will hide lower and thicker CTHs in the ERA5-based ~~data-set~~dataset. When changing to a coordinate system with respect to the  $TP_{med}$  (Fig. 9b), the distribution of all CTHs is similar beyond 0.5 km distance from the  $TP_{med}$ . Between -0.5 km and 0.5 km, there are more ~~CTHs measured than for cirrus measured by GLORIA than present in ERA5. Considering all occurrences~~When considering all occurrences of cirrus above the  $TP_{med}$ , the observations ~~deteet~~indicate about 50 % more ~~than cirrus clouds than found in ERA5~~data-set. This result indicates limitation in the cloud scheme used in the assimilation system of ERA5 for these optically thin clouds close to the tropopause.

#### 15 4.4 Example of cirrus above the tropopause

~~In~~The analysis presented in Sect. 4.2 ~~suggest~~ the presence of complete ~~layers~~ cirrus layers located above the tropopause~~was suggested~~, i.e., both CTH and CBH ~~are were~~ found above the tropopause. As a case study, an observation made during flight 16 on the 21st of October was analyzed in more detail. Figure 11 shows a zoomed area of the cross-section of the flight. ~~Only cloudy points are colored for~~For both the extinction method and CI. ~~The~~, ~~measurements with a cloud detection are marked~~



by colors. The altitude for corresponding  $TP_{med}$  and  $TP_{95}$  ~~have close values are close~~, indicating that the sampled air masses ~~are were~~ homogeneous with respect to the temperature structure around the tropopause. Both methods identify cirrus cloud at  $72.59^\circ$  N and  $69.38^\circ$  N with CTHs well above the tropopause ( $\sim 0.5$  to  $1$  km for the first cirrus cloud and  $\sim 0.5$  km for the second). ~~The CBH is slightly higher for the extinction method and above the tropopause~~ For the extinction method, the CBH  
5 was located slightly higher than for the CI method, but still within the detection error, ~~therefore, no affirmation of it being undoubtedly~~. ~~Therefore, the cirrus cannot unambiguously be ascribed to locations~~ above the tropopause ~~is made. In~~. At the location of the second cirrus there ~~is was~~ a second tropopause at  $\sim 18$  km. Therefore, the CTH of this cirrus ~~is was~~ in between tropopauses. Both clouds ~~are were~~ optically thin, with an extinction between  $3 \times 10^{-4}$  and  $5 \times 10^{-3} \text{ km}^{-1}$ . The meteorological situation ~~is was~~ characterized by a weak low pressure system on the surface close to Iceland, with an occluded front. The  
10 clouds ~~are were~~ located in an area where the wind at 200 hPa ~~changes changed~~ from southwest to west to northwest with velocities between  $20 - 28 \text{ km h}^{-1}$ . The air mass in both clouds ~~have had~~ mid-latitude characteristics, with an equivalent latitude of approximately  $51^\circ$  N. The cloud at  $72.59^\circ$  N ~~is was~~ in an area where the PV ~~varies varied~~ from 2.4 to 6 PVU and ~~is was~~ in a stable region with  $N^2$  between  $1.6$  and  $5.2 \times 10^{-4} \text{ s}^{-2}$ . ~~These values of~~ Therefore both the PV and  $N^2$  indicate the transition region between troposphere and stratosphere (Kunz et al., 2009, 2011). The cloud at  $69.38^\circ$  N ~~has PV values had~~  
15 a PV characteristic of stratospheric air masses, between 3.7 and 5.7 PVU and large static stability,  $5.6 < N^2 < 7.1 \times 10^{-4} \text{ s}^{-2}$ . ~~Values of~~  $N^2$  close to  $7 \times 10^{-4} \text{ s}^{-2}$  ~~are is~~ an indication of mixed sub-tropical and mid-latitudinal air masses (Kunz et al., 2009).

## 5 Conclusions

In this study, we analyzed cirrus cloud observations taken with the limb sounder GLORIA on board of the research aircraft HALO during the WISE campaign. We used two methods for cloud identification, the cloud index and the ~~derived retrieved~~  
20 extinction coefficient. The analysis focused on high cirrus clouds close to the tropopause and ~~did not include excluded~~ multi-layer clouds. The extinction method indicated very thin clouds with an extinction ~~of as low as~~  $2 \times 10^{-4} \text{ km}^{-1}$ . Both methods are in good agreement, having similar frequencies of occurrence and similar CTHs. The main differences are the slightly higher CTHs of the CI method and the higher CBHs from the extinction method. For studying the presence of cloud tops above the tropopause we used two approaches. First, we calculated the median tropopause from ERA5 along the LOS of the GLORIA  
25 instrument and second, we used the more conservative 95th percentile. We considered similar tropopauses as an indication of homogeneous air masses. The frequency of occurrence above the tropopause varied from 27 % to 16 % for the CI and from 24 % to 13 % for the extinction method, where the difference between both approaches were due to LOS scenes with heterogeneous tropopause heights. Our results support the higher occurrence frequencies reported in literature (Goldfarb et al., 2001; Spang et al., 2015; Zou et al., 2020) in contrast to lower ~~values frequencies~~ derived from CALIPSO (Pan and Munchak,  
30 2011; Zou et al., 2020) at mid-latitudes. Using the same criterion as in Spang et al. (2015); Zou et al. (2020), i.e. 0.5 km above the tropopause, the frequency of occurrence is 4 % – 7 %. However, as the ERA5 ~~data set dataset~~ presents a higher vertical resolution, when analyzing the frequency of occurrence 0.250 km above the tropopause, the ~~value fraction~~ increases to 13-17 %. This means, that when the uncertainty of the tropopause estimate and the measurements is smaller, the stratospheric

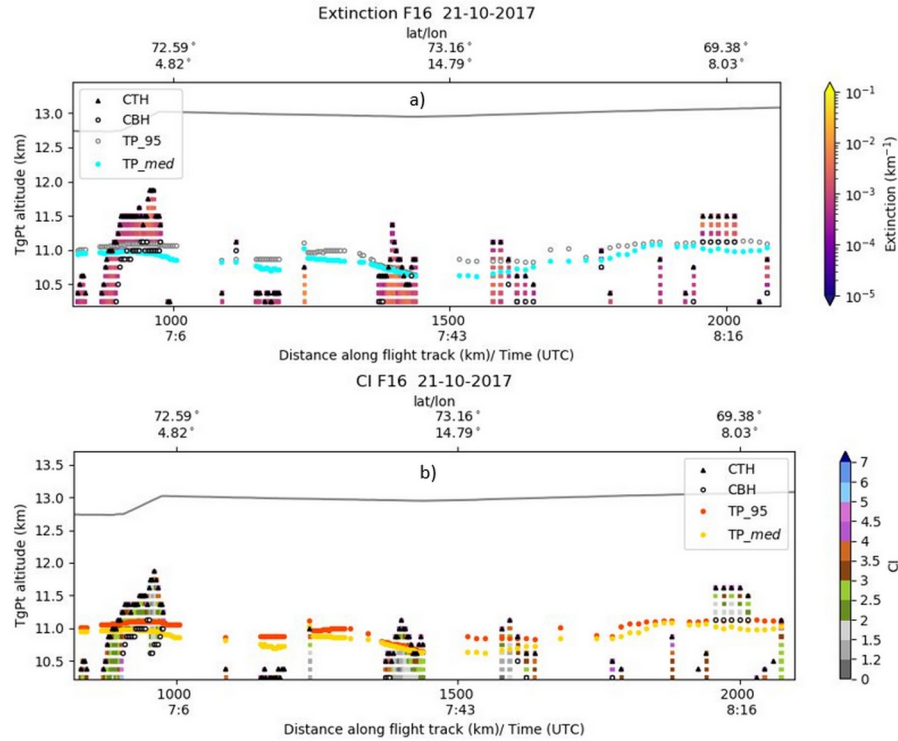

**Figure 11.** Zoomed area of the cross-section of flight 16 on the 21st of October 2017 focusing on two examples of thin cirrus above the tropopause. (a) Extinction coefficient color scale. Median tropopause ( $TP_{med}$ ) and the percentile 95 of the tropopause ( $TP_{95}$ ) are indicated with blue dots and grey dots, respectively. (b) Cloud index color scale. Median tropopause ( $TP_{med}$ ) and the percentile 95 of the tropopause ( $TP_{95}$ ) are indicated with yellow dots and orange dots, respectively. Black triangles indicate the CTHs and the white circles the CBHs. The grey line marks the flight trajectory. The altitude of the tangent points (TgPt) is the y axis.

5 cirrus cloud occurrence frequencies are even higher. 1.5 km below the tropopause both identification methods present good agreement with the clouds indicated by the ERA5 data-setdataset, when taken the observation geometry of GLORIA into account. However, the observed occurrence of cloud tops close to and above the tropopause is about 50 % higher than indicated by ERA5. We found CBHs above the tropopause, but they were within the uncertainties. Consequently, the GLORIA WISE campaign data cannot confirm the presence of unattached cirrus layers above the first thermal tropopause, but can confirm the presence of cirrus clouds at the tropopause with CTHs penetrating well into the lower stratosphere.

*Data availability.* The retrievals can be requested from the author.

*Competing interests.* The authors declare that they have no conflict of interests.

*Acknowledgements.* The authors are grateful to the ECMWF for providing operational analysis and forecast as well as reanalysis data. The authors acknowledge funding from the DFG, in the *Cirrus clouds in the extra-tropical tropopause and lowermost stratosphere region (CiTroS) project*, project number SP 969/1-1, part of the HALO Priority Program SPP 1294. Special thanks to the GLORIA team, including the technology institutes ZEA-1 and ZEA-2 at Forschungszentrum Jülich and the Institute for Data Processing and Electronics at the Karlsruhe Institute of Technology. The authors also thank the WISE team, DLR-FX and the pilots.

## References

- Baran, A. J.: The dependence of cirrus infrared radiative properties on ice crystal geometry and shape of the size-distribution function, *Quarterly Journal of the Royal Meteorological Society*, 131, 1129–1142, <https://doi.org/https://doi.org/10.1256/qj.04.91>, 2005.
- Blank, J.: Tomographic retrieval of atmospheric trace gases observed by GLORIA, Ph.D thesis, Bergische Universität Wuppertal, Germany, <https://juser.fz-juelich.de/record/150342>, 2013.
- 5 Curtis, A. R.: Discussion of ‘A statistical model for water vapour absorption’ by R. M. Goody, *Quart. J. Roy. Meteorol. Soc.*, 78, 638–640, 1952.
- Davis, S., Hlavka, D., Jensen, E., Rosenlof, K., Yang, Q. O., Schmidt, S., Borrmann, S., Frey, W., Lawson, P., Voemel, H., and Bui, T. P.: In situ and lidar observations of tropopause subvisible cirrus clouds during TC4, *J. Geophys. Res.*, 115, <https://doi.org/10.1029/2009JD013093>, 2010.
- 10 Dessler, A. E.: Clouds and water vapor in the Northern Hemisphere summertime stratosphere, *J. Geophys. Res.*, 114, D00H09, <https://doi.org/10.1029/2009JD012075>, 2009.
- Dudhia, A.: The Reference Forward Model (RFM), *J. Quant. Spectrosc. Radiat. Transfer*, 186, 243–253, <https://doi.org/http://dx.doi.org/10.1016/j.jqsrt.2016.06.018>, 2017.
- 15 Friedl-Vallon, F., Gulde, T., Hase, F., Kleinert, A., Kulesa, T., Maucher, G., Neubert, T., Olschewski, F., Piesch, C., Preusse, P., Rongen, H., Sartorius, C., Schneider, H., Schoenfeld, A., Tan, V., Bayer, N., Blank, J., Dapp, R., Ebersoldt, A., Fischer, H., Graf, F., Guggenmoser, T., Hoepfner, M., Kaufmann, M., Kretschmer, E., Latzko, T., Nordmeyer, H., Oelhaf, H., Orphal, J., Riese, M., Schardt, G., Schillings, J., Sha, M. K., Suminska-Ebersoldt, O., and Ungermann, J.: Instrument concept of the imaging Fourier transform spectrometer GLORIA, *Atmos. Meas. Tech.*, 7, 3565–3577, <https://doi.org/10.5194/amt-7-3565-2014>, 2014.
- 20 Fusina, F., Spichtinger, P., and Lohmann, U.: Impact of ice supersaturated regions and thin cirrus on radiation in the midlatitudes, *J. Geophys. Res.*, 112, D24S14, <https://doi.org/10.1029/2007JD008449>, 2007.
- Godson, W. L.: The evaluation of infra-red radiative fluxes due to atmospheric water vapour, *Quart. J. Roy. Meteorol. Soc.*, 79, 367–379, 1953.
- Goldfarb, L., Keckhut, P., Chanin, M.-L., and Hauchecorne, A.: Cirrus climatological results from lidar measurements at OHP (44°N, 6°E), *Geophys. Res. Lett.*, 28, 1687–1690, <https://doi.org/10.1029/2000GL012701>, 2001.
- 25 Gordley, L. L. and Russell, J. M.: Rapid inversion of limb radiance data using an emissivity growth approximation, *Appl. Optics*, 20, 807–813, 1981.
- Griessbach, S., Hoffmann, L., Hoepfner, M., Riese, M., and Spang, R.: Scattering in infrared radiative transfer: A comparison between the spectrally averaging model JURASSIC and the line-by-line model KOPRA, *J. Quant. Spectrosc. Radiat. Transfer*, 27, 102–118, <https://doi.org/10.1016/j.jqsrt.2013.05.004>, 2013.
- 30 Griessbach, S., Hoffmann, L., Spang, R., and Riese, M.: Volcanic ash detection with infrared limb sounding: MIPAS observations and radiative transfer simulations, *Atmos. Meas. Tech.*, 7, 1487–1507, <https://doi.org/10.5194/amt-7-1487-214>, 2014.
- Griessbach, S., Hoffmann, L., Spang, R., von Hobe, M., Müller, R., and Riese, M.: Infrared limb emission measurements of aerosol in the troposphere and stratosphere, *Atmos. Meas. Tech.*, 9, 4399–4423, <https://doi.org/10.5194/amt-9-4399-2016>, 2016.
- 35 Griessbach, S., Hoffmann, L., Spang, R., Achtert, P., von Hobe, M., Matashvili, N., Müller, R., Riese, M., Rolf, C., Seifert, P., and Vernier, J.-P.: Aerosol and cloud top height information of Envisat MIPAS measurements, *Atmos. Meas. Tech.*, 13, 1243–1271, <https://doi.org/10.5194/amt-13-1243-2020>, 2020.

- Hersbach, H., Bell, B., Berrisford, P., Hirahara, S., Horányi, A., Muñoz-Sabater, J., Nicolas, J., Peubey, C., Radu, R., Schepers, D., Simmons, A., Soci, C., Abdalla, S., Abellan, X., Balsamo, G., Bechtold, P., Biavati, G., Bidlot, J., Bonavita, M., De Chiara, G., Dahlgren, P., Dee, D., Diamantakis, M., Dragani, R., Flemming, J., Forbes, R., Fuentes, M., Geer, A., Haimberger, L., Healy, S., Hogan, R. J., Hólm, E., Janisková, M., Keeley, S., Laloyaux, P., Lopez, P., Lupu, C., Radnoti, G., de Rosnay, P., Rozum, I., Vamborg, F., Villaume, S., and Thépaut, J.-N.: The ERA5 global reanalysis, *Quart. J. Roy. Meteorol. Soc.*, 146, 1999–2049, <https://doi.org/10.1002/qj.3803>, 2020.
- 5 Hoffmann, L.: Schnelle Spurengasretrieval für das Satellitenexperiment Envisat MIPAS, Ph.D thesis, Bergische Universität Wuppertal, Germany, ISSN 0944-2952, 2006.
- Hoffmann, L., Kaufmann, M., Spang, R., Müller, R., Remedios, J., Moore, D. P., Volk, C. M., von Clarmann, T., and Riese, M.: Envisat MIPAS measurements of CFC-11: retrieval, validation, and climatology, *Atmos. Chem. Phys.*, 8, 3671–3688, 2008.
- 10 Höpfner, M. and Emde, C.: Comparison of single and multiple scattering approaches for the simulation of limb-emission observations in the mid-IR, *J. Quant. Spectrosc. Radiat. Transfer*, 91, 275–285, 2005.
- Höpfner, M., Ungermann, J., Borrmann, S., Wagner, R., Spang, R., Riese, M., Stiller, G., Appel, O., Batenburg, A. M., Bucci, S., Cairo, F., Dragoneas, A., Friedl-Vallon, F., Hünig, A., Johansson, S., Krasauskas, L., Legras, B., Leisner, T., Mahnke, C., Möhler, O., Molleker, S., Müller, R., Neubert, T., Orphal, J., Preusse, P., Rex, M., Saathoff, H., Strohm, F., Weigel, R., and Wohltmann, I.: Ammonium nitrate particles formed in upper troposphere from ground ammonia sources during Asian monsoons, *Nature Geosciences*, 12, 608–612, <https://doi.org/10.1038/s41561-019-0385-8>, 2019.
- 15 IPCC: Climate Change 2013: The Physical Science Basis. Contribution of Working Group I to the Fifth Assessment Report of the Intergovernmental Panel on Climate Change, Cambridge University Press, Cambridge, United Kingdom and New York, NY, USA, <https://doi.org/10.1017/CBO9781107415324>, 2013.
- 20 Kalicinsky, C., Griessbach, S., and Spang, R.: Radiative transfer simulations and observations of infrared spectra in the presence of polar stratospheric clouds: Detection and discrimination of cloud types, *Atmos. Meas. Tech. Discuss.*, 2020, 1–28, <https://doi.org/10.5194/amt-2020-144>, 2020.
- Keckhut, P., Hauchecorne, A., Bekki, S., Colette, A., David, C., and Jumelet, J.: Indications of thin cirrus clouds in the stratosphere at mid-latitudes, *Atmos. Chem. Phys.*, 5, 3407–3414, 2005.
- 25 Kent, G. S., Winker, D. M., Vaughan, M. A., Wang, P. H., and Skeens, K. M.: Simulation of Stratospheric Aerosol and Gas Experiment (SAGE) II cloud measurements using airborne lidar data, *J. Geophys. Res.*, 102, 21 795–21 807, <https://doi.org/10.1029/97JD01390>, 1997.
- Kleinert, A., Friedl-Vallon, F., Guggenmoser, T., Höpfner, M., Neubert, T., Ribalda, R., Sha, M., Ungermann, J., Blank, J., Ebersoldt, A., Kretschmer, E., Latzko, T., Oelhaf, H., Olschewski, F., and Preusse, P.: Level 0 to 1 processing of the imaging Fourier transform spectrometer GLORIA: generation of radiometrically and spectrally calibrated spectra, *Atmos. Meas. Tech.*, 7, 4167–4184, <https://doi.org/10.5194/amt-7-4167-2014>, 2014.
- 30 Krämer, M., Rolf, C., Luebke, A., Afchine, A., Spelten, N., Costa, A., Meyer, J., Zoeger, M., Smith, J., Herman, R. L., Buchholz, B., Ebert, V., Baumgardner, D., Borrmann, S., Klingebiel, M., and Avallone, L.: A microphysics guide to cirrus clouds - Part 1: Cirrus types, *Atmos. Chem. Phys.*, 16, 3463–3483, <https://doi.org/10.5194/acp-16-3463-2016>, 2016.
- Krisch, I., Ungermann, J., Preusse, P., Kretschmer, E., and Riese, M.: Limited angle tomography of mesoscale gravity waves by the infrared limb-sounder GLORIA, *Atmos. Meas. Tech.*, 11, 4327–4344, <https://doi.org/10.5194/amt-11-4327-2018>, 2018.
- 35 Kunz, A., Konopka, P., Müller, R., Pan, L., Schiller, C., and Rohrer, F.: High static stability in the mixing layer above the extratropical tropopause, *J. Geophys. Res.*, 114, D16 305, <https://doi.org/10.1029/2009JD011840>, 2009.

- Kunz, A., Konopka, P., Müller, R., and Pan, L. L.: Dynamical tropopause based on isentropic potential vorticity gradients, *J. Geophys. Res.*, 116, D01 110, <https://doi.org/10.1029/2010JD014343>, 2011.
- Liou, K.-N.: Influence of Cirrus Clouds on Weather and Climate Processes: A Global Perspective, *Monthly Weather Review*, 114, 1167–1199, [https://doi.org/10.1175/1520-0493\(1986\)114<1167:IOCCOW>2.0.CO;2](https://doi.org/10.1175/1520-0493(1986)114<1167:IOCCOW>2.0.CO;2), 1986.
- 5 Luebke, A. E., Afchine, A., Costa, A., Groß, J.-U., Meyer, J., Rolf, C., Spelten, N., Avallone, L. M., Baumgardner, D., and Krämer, M.: The origin of midlatitude ice clouds and the resulting influence on their microphysical properties, *Atmos. Chem. Phys.*, 16, 5793–5809, <https://doi.org/10.5194/acp-16-5793-2016>, 2016.
- Martins, E., Noel, V., and Chepfer, H.: Properties of cirrus and subvisible cirrus from nighttime Cloud-Aerosol Lidar with Orthogonal Polarization (CALIOP), related to atmospheric dynamics and water vapor, *Journal of Geophysical Research: Atmospheres*, 116, <https://doi.org/https://doi.org/10.1029/2010JD014519>, 2011.
- 10 Noël, V. and Haeffelin, M.: Midlatitude cirrus clouds and multiple tropopauses from a 2002–2006 climatology over the SIRTa observatory, *J. Geophys. Res.*, 112, D13 206, <https://doi.org/10.1029/2006JD007753>, 2007.
- Pan, L. L. and Munchak, L. A.: Relationship of cloud top to the tropopause and jet structure from CALIPSO data, *J. Geophys. Res.*, 116, D12 201, <https://doi.org/10.1029/2010JD015462>, 2011.
- 15 Petty, G. W.: A first Course in Atmospheric Radiation, Sundog Publishing, 2006.
- Reverdy, M., Noel, V., Chepfer, H., and Legras, B.: On the origin of subvisible cirrus clouds in the tropical upper troposphere, *Atmos. Chem. Phys.*, 12, 12 081–12 101, <https://doi.org/10.5194/acp-12-12081-2012>, <https://acp.copernicus.org/articles/12/12081/2012/>, 2012.
- Riese, M., Kaufmann, and M., Hoor, P.: WISE: project description, <https://www.halo.dlr.de/science/missions/wise/wise.html>, 2017, last accessed: 13 August 2020.
- 20 Riese, M., Ploeger, F., Rap, A., Vogel, B., Konopka, P., Dameris, M., and Forster, P.: Impact of uncertainties in atmospheric mixing on simulated UTLS composition and related radiative effects, *J. Geophys. Res.*, 117, D16 305, <https://doi.org/10.1029/2012JD017751>, 2012.
- Riese, M., Oelhaf, H., Preusse, P., Blank, J., Ern, M., Friedl-Vallon, F., Fischer, H., Guggenmoser, T., Hoepfner, M., Hoor, P., Kaufmann, M., Orphal, J., Ploeger, F., Spang, R., Suminska-Ebersoldt, O., Ungermann, J., Vogel, B., and Woiwode, W.: Gimballed Limb Observer for Radiance Imaging of the Atmosphere (GLORIA) scientific objectives, *Atmos. Meas. Tech.*, 7, 1915–1928, [https://doi.org/10.5194/amt-7-](https://doi.org/10.5194/amt-7-1915-2014)
- 25 1915-2014, 2014.
- Sassen, K. and Cho, B. S.: Subvisual-thin cirrus lidar data set for satellite verification and climatological research, *J. Appl. Met.*, 31, 1275–1285, 1992.
- Sassen, K., Wang, Z., and Liu, D.: Global distribution of cirrus clouds from CloudSat/Cloud-Aerosol Lidar and Infrared Pathfinder Satellite Observations (CALIPSO) measurements, *J. Geophys. Res.*, 113, D00A12, <https://doi.org/10.1029/2008JD009972>, 2008.
- 30 Sembhi, H., Remedios, J., Trent, T., Moore, D. P., Spang, R., Massie, S., and Vernier, J. P.: MIPAS detection of cloud and aerosol particle occurrence in the UTLS with comparison to HIRDLS and CALIOP, *Atmos. Meas. Tech.*, 5, 2537–2553, [https://doi.org/10.5194/amt-5-](https://doi.org/10.5194/amt-5-2537-2012)
- 2537-2012, 2012.
- Spang, R., Riese, M., and Offermann, D.: CRISTA-2 observations of the south polar vortex in winter 1997: A new dataset for polar process studies, *Geophys. Res. Lett.*, 28, 3159–3162, <https://doi.org/10.1029/2000GL012374>, 2001.
- 35 Spang, R., Hoffmann, L., Kullmann, A., Olschewski, F., Preusse, P., Knieling, P., Schroeder, S., Strohm, F., Weigel, K., and Riese, M.: High resolution limb observations of clouds by the CRISTA-NF experiment during the SCOUT-O3 tropical aircraft campaign, *Adv. Space Res.*, 42, 1765–1775, <https://doi.org/10.1016/j.asr.2007.09.036>, 2008.

- Spang, R., Arndt, K., Dudhia, A., Höpfner, M., Hoffmann, L., Hurley, J., Grainger, R. G., Griessbach, S., Poulsen, C., Remedios, J. J., Riese, M., Sembhi, H., Siddans, R., Waterfall, A., and Zehner, C.: Fast cloud parameter retrievals of MIPAS/Envisat, *Atmos. Chem. Phys.*, 12, 7135–7164, <https://doi.org/10.5194/acp-12-7135-2012>, 2012.
- Spang, R., Günther, G., Riese, M., Hoffmann, L., Müller, R., and Griessbach, S.: Satellite observations of cirrus clouds in the Northern Hemisphere lowermost stratosphere, *Atmos. Chem. Phys.*, 15, 927–950, <https://doi.org/10.5194/acp-15-927-2015>, 2015.
- Spang, R., Hoffmann, L., Höpfner, M., Griessbach, S., Müller, R., Pitts, M. C., Orr, A. M. W., and Riese, M.: A multi-wavelength classification method for polar stratospheric cloud types using infrared limb spectra, *Atmos. Meas. Tech.*, 9, 3619–3639, <https://doi.org/10.5194/amt-9-3619-2016>, 2016.
- Ungermann, J.: On Quantifying and Mitigation GLORIA Instrument Effects and Uncertainties, 2021, in prep.
- Ungermann, J., Blank, J., Lotz, J., Leppkes, K., Hoffmann, L., Guggenmoser, T., Kaufmann, M., Preusse, P., Naumann, U., and Riese, M.: A 3-D tomographic retrieval approach with advection compensation for the air-borne limb-imager GLORIA, *Atmos. Meas. Tech.*, 4, 2509 – 2529, <https://doi.org/10.5194/amt-4-2509-2011>, 2011.
- Ungermann, J., Blank, J., Dick, M., Ebersoldt, A., Friedl-Vallon, F., Giez, A., Guggenmoser, T., Höpfner, M., Jurkat, T., Kaufmann, M., Kaufmann, S., Kleinert, A., Krämer, M., Latzko, T., Oelhaf, H., Olchewski, F., Preusse, P., Rolf, C., Schillings, J., and Riese, M.: Level 2 processing for the imaging Fourier transform spectrometer GLORIA: Derivation and validation of temperature and trace gas volume mixing ratios from calibrated dynamics mode spectra, *Atmos. Meas. Tech.*, 8, 2473–2489, <https://doi.org/10.5194/amt-8-2473-2015>, 2015.
- Ungermann, J., Bartolome, I., Griessbach, S., Spang, R., Rolf, C., Krämer, M., Höpfner, M., and Riese, M.: Cirrus cloud shape detection by tomographic extinction retrievals from infrared limb emission sounder measurements, *Atmos. Meas. Tech. Discuss.*, 2020, 1–35, <https://doi.org/10.5194/amt-2020-256>, 2020.
- van de Hulst, H. C.: Light scattering by small particles. By H. C. van de Hulst. New York (John Wiley and Sons), London (Chapman and Hall), 1957. Pp. xiii, 470; 103 Figs.; 46 Tables. 96s, *Quarterly Journal of the Royal Meteorological Society*, 84, 198–199, <https://doi.org/https://doi.org/10.1002/qj.49708436025>, 1958.
- Wallace, J. and Hobbs, P.: Atmospheric Science: An Introductory Survey, International Geophysics Series, Elsevier Academic Press, 2006.
- Weinreb, M. P. and Neuendorffer, A. C.: Method to apply homogeneous-path transmittance models to inhomogenous atmospheres, *J. Atmos. Sci.*, 30, 662–666, 1973.
- WMO: Meteorology – A three-dimensional science, *WMO Bull.*, 4, 134–138, 1957.
- Yang, P., Gao, B.-C., Baum, B. A., Hu, Y. X., Wiscombe, W. J., Tsay, S.-C., Winker, D. M., and Nasiri, S. L.: Radiative properties of cirrus clouds in the infrared (8–13  $\mu\text{m}$ ) spectral region, *Journal of Quantitative Spectroscopy and Radiative Transfer*, 70, 473 – 504, [https://doi.org/https://doi.org/10.1016/S0022-4073\(01\)00024-3](https://doi.org/https://doi.org/10.1016/S0022-4073(01)00024-3), light Scattering by Non-Spherical Particles, 2001.
- Zou, L., Griessbach, S., Hoffmann, L., Gong, B., and Wang, L.: Revisiting global satellite observations of stratospheric cirrus clouds, *Atmos. Chem. Phys.*, 20, 9939–9959, <https://doi.org/10.5194/acp-20-9939-2020>, 2020.
